# Supplementary material for: Impact on percutaneous coronary intervention for acute coronary syndromes during the COVID-19 outbreak in a non-overwhelmed European healthcare system: COVID-19 ACS-PCI experience in Ireland
Source: PubMed Central journal article supplement — BMJ Open. 2021 Apr 2;11(4):e045590. doi: 10.1136/bmjopen-2020-045590 (PMC8023726; doi:10.1136/bmjopen-2020-045590), 2021-04-02
Supplement: bmjopen-2020-045590.draft_revisions.pdf [file bmjopen-2020-045590.draft_revisions.pdf]

# BMJ Open

BMJ Open is committed to open peer review. As part of this commitment we make the peer review history of every article we publish publicly available.

When an article is published we post the peer reviewers' comments and the authors' responses online. We also post the versions of the paper that were used during peer review. These are the versions that the peer review comments apply to.

The versions of the paper that follow are the versions that were submitted during the peer review process. They are not the versions of record or the final published versions. They should not be cited or distributed as the published version of this manuscript.

BMJ Open is an open access journal and the full, final, typeset and author-corrected version of record of the manuscript is available on our site with no access controls, subscription charges or pay-per-view fees (<http://bmjopen.bmj.com>).

If you have any questions on BMJ Open's open peer review process please email [info.bmjopen@bmj.com](mailto:info.bmjopen@bmj.com)

# BMJ Open

## Reduction in Percutaneous Coronary Intervention for Acute Coronary Syndromes during the COVID-19 outbreak in a non-overwhelmed European health care system: COVID ACS-PCI Experience in Ireland

|                               |                                                                                                                                                                                                                                                                                                                                                                                                                                                                                                                                                                                                                                                                                                                                                                                                                                                                                                                                                                                                                                                                                                                                                                                                   |
|-------------------------------|---------------------------------------------------------------------------------------------------------------------------------------------------------------------------------------------------------------------------------------------------------------------------------------------------------------------------------------------------------------------------------------------------------------------------------------------------------------------------------------------------------------------------------------------------------------------------------------------------------------------------------------------------------------------------------------------------------------------------------------------------------------------------------------------------------------------------------------------------------------------------------------------------------------------------------------------------------------------------------------------------------------------------------------------------------------------------------------------------------------------------------------------------------------------------------------------------|
| Journal:                      | <i>BMJ Open</i>                                                                                                                                                                                                                                                                                                                                                                                                                                                                                                                                                                                                                                                                                                                                                                                                                                                                                                                                                                                                                                                                                                                                                                                   |
| Manuscript ID                 | bmjopen-2020-045590                                                                                                                                                                                                                                                                                                                                                                                                                                                                                                                                                                                                                                                                                                                                                                                                                                                                                                                                                                                                                                                                                                                                                                               |
| Article Type:                 | Original research                                                                                                                                                                                                                                                                                                                                                                                                                                                                                                                                                                                                                                                                                                                                                                                                                                                                                                                                                                                                                                                                                                                                                                                 |
| Date Submitted by the Author: | 06-Oct-2020                                                                                                                                                                                                                                                                                                                                                                                                                                                                                                                                                                                                                                                                                                                                                                                                                                                                                                                                                                                                                                                                                                                                                                                       |
| Complete List of Authors:     | <p>Connolly, Niall; Galway University Hospitals, Dept. of Cardiology<br/> Simpkin, Andrew; National University of Ireland Galway, School of Medicine<br/> Mylotte, Darren; Galway University Hospitals, Dept. of Cardiology<br/> Crowley, James; Galway University Hospitals, Dept. of Cardiology;<br/> National University of Ireland Galway, School of Medicine<br/> O'Connor, Stephen; St. James' Hospital, Dublin, Dept. of Cardiology<br/> AlHarbi, Khalid; St. James' Hospital, Dublin, Dept. of Cardiology<br/> Kiernan, Thomas; University of Limerick; University Hospital Limerick,<br/> Dept. of Cardiology<br/> Arockiam, Sacchin; University Hospital Limerick, Dept. of Cardiology<br/> Owens, Patrick; University Hospital Waterford, Dept. of Cardiology<br/> John, Amal; University Hospital Waterford, Dept. Of Cardiology<br/> Blake, Gavin; Mater Misericordiae University Hospital, Dept. of<br/> Cardiology<br/> Fitzgerald, Sean; Mater Misericordiae University Hospital, Dept. of<br/> Cardiology<br/> Cadogan, Diarmaid; Mater Misericordiae University Hospital, Dept. of<br/> Cardiology<br/> Rosseel, Liesbeth; Galway University Hospitals, Dept. of Cardiology</p> |
| Keywords:                     | COVID-19, Ischaemic heart disease < CARDIOLOGY, Coronary intervention < CARDIOLOGY, PUBLIC HEALTH                                                                                                                                                                                                                                                                                                                                                                                                                                                                                                                                                                                                                                                                                                                                                                                                                                                                                                                                                                                                                                                                                                 |
|                               |                                                                                                                                                                                                                                                                                                                                                                                                                                                                                                                                                                                                                                                                                                                                                                                                                                                                                                                                                                                                                                                                                                                                                                                                   |

SCHOLARONE™  
Manuscripts

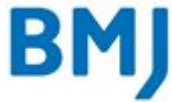

I, the Submitting Author has the right to grant and does grant on behalf of all authors of the Work (as defined in the below author licence), an exclusive licence and/or a non-exclusive licence for contributions from authors who are: i) UK Crown employees; ii) where BMJ has agreed a CC-BY licence shall apply, and/or iii) in accordance with the terms applicable for US Federal Government officers or employees acting as part of their official duties; on a worldwide, perpetual, irrevocable, royalty-free basis to BMJ Publishing Group Ltd ("BMJ") its licensees and where the relevant Journal is co-owned by BMJ to the co-owners of the Journal, to publish the Work in this journal and any other BMJ products and to exploit all rights, as set out in our [licence](#).

The Submitting Author accepts and understands that any supply made under these terms is made by BMJ to the Submitting Author unless you are acting as an employee on behalf of your employer or a postgraduate student of an affiliated institution which is paying any applicable article publishing charge ("APC") for Open Access articles. Where the Submitting Author wishes to make the Work available on an Open Access basis (and intends to pay the relevant APC), the terms of reuse of such Open Access shall be governed by a Creative Commons licence – details of these licences and which [Creative Commons](#) licence will apply to this Work are set out in our licence referred to above.

Other than as permitted in any relevant BMJ Author's Self Archiving Policies, I confirm this Work has not been accepted for publication elsewhere, is not being considered for publication elsewhere and does not duplicate material already published. I confirm all authors consent to publication of this Work and authorise the granting of this licence.

1  
2  
3 **Reduction in Percutaneous Coronary Intervention for Acute Coronary Syndromes during the**  
4  
5 **COVID-19 outbreak in a non-overwhelmed European health care system: COVID ACS-PCI**  
6  
7  
8 **Experience in Ireland**  
9

10 Niall P Connolly<sup>1</sup>, Andrew J Simpkin<sup>2</sup>, Darren Mylotte<sup>1</sup>, James Crowley<sup>1,2</sup>, Stephen O'Connor<sup>3</sup>, Khalid  
11 AlHarbi<sup>3</sup>, Thomas J Kiernan<sup>4</sup>, Sacchin Arockiam<sup>4</sup>, Patrick Owens<sup>5</sup>, Amal John<sup>5</sup>, Gavin J Blake<sup>6</sup>, Sean  
12 Fitzgerald<sup>6</sup>, Diarmaid Cadogan<sup>6</sup>, Liesbeth Rosseel<sup>1</sup>  
13  
14  
15

16  
17  
18  
19 <sup>1</sup> Department of Cardiology, Galway University Hospital, Ireland

20  
21 <sup>2</sup> School of Medicine, National University of Ireland Galway, Ireland

22  
23 <sup>3</sup> Department of Cardiology, St James' Hospital, Dublin, Ireland

24  
25 <sup>4</sup> Department of Cardiology, University Hospital Limerick, Ireland

26  
27 <sup>5</sup> Department of Cardiology, University Hospital Waterford, Ireland

28  
29 <sup>6</sup> Department of Cardiology, Mater Misericordiae University Hospital Dublin, Ireland  
30  
31  
32

33  
34 Word Count: 2251 (excluding figure legends and references)  
35

36  
37 Figures: 3  
38

39  
40 Tables: 2

41  
42 Keywords: COVID-19, percutaneous coronary intervention, acute coronary syndrome, Ireland

43  
44 Conflicts of interest: Darren Mylotte is a consultant for Medtronic, Boston Scientific, and Microport.  
45

46  
47 The other authors have no conflicts of interest to declare.  
48  
49

50  
51 Corresponding Author:

52 Niall Connolly

53 Department of Cardiology

54 Galway University Hospital

55 Newcastle Road, Galway, Ireland

56  
57  
58 Mail: [niallcon@gmail.com](mailto:niallcon@gmail.com)  
59  
60

**ABSTRACT:****Aims**

To evaluate temporal trends of acute coronary syndromes (ACS) treated via percutaneous coronary intervention (PCI) throughout the COVID-19 outbreak in a European healthcare system affected but not overwhelmed by COVID-19 related pathology.

**Methods and Results**

We performed a retrospective multicentre analysis of the rates of PCI for the treatment of ACS within the period two months pre and post the first confirmed COVID-19 case in Ireland, as well as comparing PCI for ST-Elevation Myocardial Infarction (STEMI) with the corresponding period in 2019. During the 2020-COVID period (29<sup>th</sup> February – 30<sup>th</sup> April 2020) there was a 24% decline in PCI for overall ACS (incidence rate ratio (IRR) 0.76; 95% confidence interval (CI) 0.65-0.88; P<0.001), including a 29% reduction in PCI for Non-ST Elevation-ACS (IRR 0.71; 95% CI 0.57-0.88; P=0.002) and an 18% reduction in PCI for STEMI (IRR 0.82; 95% CI 0.67-1.01; P=0.061), as compared to the 2020-PreCOVID period (January 1<sup>st</sup> - February 28<sup>th</sup> 2020). A 22% (IRR 0.78; 95% CI 0.65-0.93; P=0.005) reduction of PCI for STEMI was seen as compared with the 2019 reference period.

**Conclusion**

This study demonstrates a significant reduction in PCI procedures for the treatment of ACS since the COVID-19 outbreak in Ireland. The reasons for this decline are still unclear but patients need to be encouraged to seek medical attention when cardiac symptoms appear, in order to avoid incremental cardiac morbidity and mortality due to reduced rates of coronary revascularisation for the treatment of ACS.

**Keywords:** COVID-19, coronary intervention, ischaemic heart disease, public health

## ARTICLE SUMMARY

### Strengths and limitations of the study:

- This is a retrospective multicentre analysis of the temporal trends of acute coronary syndromes (ACS) treated via percutaneous coronary intervention (PCI) throughout the initial COVID-19 outbreak in Ireland.
- The participating centres account for 79.6% of all STEMI presentations in Ireland giving a very good representation of the overall national picture.
- The figures represent daily numbers of PCI procedures for the treatment of ACS, rather than hospital admission for PCI which could underestimate the true incidence of ACS presenting to hospitals due to alterations in clinical practice patterns, such as a potential for increased use of non-invasive strategies.
- The analysis was performed inter-year and intra-year thus allowing the assessment for confounding by seasonable variations in presentations with ACS.
- The overall impact on cardiovascular and mortality hard outcomes are not currently measurable within the remit of this study.

1  
2  
3 **Text:**  
4

5 **INTRODUCTION**  
6

7  
8 The Coronavirus disease 2019 (COVID-19) pandemic has brought many challenges for  
9  
10 healthcare systems and has had a huge impact on social behaviour. To minimise the spread of  
11  
12 infection social distancing measures and wide restrictions in the movement of people have been  
13  
14 implemented. Intermittent deferral of non-urgent and elective care has been a central tenet to  
15  
16 increase hospital capacity to deal with the surge in COVID-19 cases and to avoid unnecessary exposure  
17  
18 of patients to a hospital environment where COVID-19 may be more prevalent.  
19

20  
21 Initial expectations would have been for an increase in acute coronary syndrome (ACS)  
22  
23 presentations in line with existing evidence suggesting a link between respiratory infections and  
24  
25 subsequent myocardial infarction[1,2]. However, first reports during the initial phase of the COVID-19  
26  
27 outbreak showed a decline in presentations of ST-elevation myocardial infarction (STEMI) and hospital  
28  
29 admissions for ACS, even in geographies where the health care system was not overwhelmed by  
30  
31 COVID-19 pathology[3-8]. As percutaneous coronary intervention (PCI) has a proven beneficial  
32  
33 outcome in the management of ACS, there is a concern that a similar decline in PCI procedures during  
34  
35 the COVID-19 pandemic could lead to incremental cardiac morbidity and mortality[9].  
36  
37

38  
39 As opposed to the above-mentioned studies, that investigated rates of STEMI or ACS hospital  
40  
41 admissions, we evaluated temporal trends in the rates of PCI procedures performed for the treatment  
42  
43 of ACS during and before the COVID-19 outbreak. This study represents data from the Republic of  
44  
45 Ireland, a European country where widespread social and lockdown measures were implemented  
46  
47 during the first wave of the COVID-19 outbreak, and the healthcare system has been affected, but not  
48  
49 overwhelmed by COVID-19 related pathology.  
50  
51

52  
53  
54 **METHODS**  
55  
56  
57  
58  
59  
60

1  
2  
3 In this multicentre retrospective registry, we examine the daily rates of PCI performed for the  
4 treatment of ACS during three different time periods in relation to the COVID-19 outbreak in Ireland.  
5  
6 Participation was voluntary and data was anonymously collected by each participating centre in a  
7  
8 dedicated electronic dataset. Cases were identified from cardiac catheterisation laboratory and  
9  
10 hospital admission records and cross-referenced with patient electronic records to provide accurate  
11  
12 descriptors of the indication for PCI. Variables were categorised according to the indication and timing  
13  
14 of PCI. National data regarding the COVID-19 outbreak were collected from the official Department of  
15  
16 Health resources[10]. Ethical approval for the study was gained from the National Research Ethics  
17  
18 Committee (NREC) established for COVID-19 related research in Ireland.  
19  
20  
21  
22

### 23 24 **Patient and Public Involvement**

25  
26 Patients or the public were not involved in the design, or conduct, or reporting, or  
27  
28 dissemination plans of our research  
29  
30

### 31 32 **Study Population**

33  
34 The Health Service Executive (HSE) dedicated ACS Programme designates six primary PCI  
35  
36 centres in Ireland[11]. In this study the data are collected from five primary PCI facilities (Galway  
37  
38 University Hospitals, Mater Misericordiae University Hospital Dublin, St. James's Hospital Dublin,  
39  
40 University Hospital Limerick and Waterford University Hospital). The five participating centres in this  
41  
42 study account for 79.7% of STEMI presentations in Ireland based on the latest published national  
43  
44 data[12]. This study does not include any private health care facilities which also treat non-ST  
45  
46 elevation acute coronary syndromes (NSTEMI-ACS), but not STEMI cases.  
47  
48  
49

### 50 51 **Definitions**

52  
53 The daily rates of PCI procedures performed only for the treatment of ACS (ACS-PCI) during  
54  
55 three delineated time periods were included in this study. The overall PCI group ('All ACS') was  
56  
57 dichotomised into two groups, as defined by the European Society of Cardiology guidelines: (1)  
58  
59  
60



1  
2  
3 'STEMI', and, (2) 'NSTEMI-ACS', with the latter representing PCI performed for non-ST elevation  
4 myocardial Infarction (NSTEMI) and unstable angina (UA)[13,14]. Daily ACS-PCI rates were collected  
5  
6 for three separate time periods: (1) the '2020-COVID' period, was set from the date of the first  
7 confirmed COVID-19 case in Ireland, February 29<sup>th</sup> 2020, until April 30<sup>th</sup> 2020 (62 days); (2) the '2020-  
8 PreCovid' including January 1<sup>st</sup> to February 28<sup>th</sup> 2020 (59 days); and, (3) the '2019-Reference' period  
9 covering January to April 2019 (120 days). Daily PCI rates for STEMI were collected for the '2019-  
10 Reference', '2020-PreCOVID' and the '2020-COVID' periods, whilst data regarding PCI performed for  
11 the treatment of NSTEMI-ACS were collected for the '2020-PreCOVID' and '2020-COVID' periods.  
12  
13  
14  
15  
16  
17  
18  
19  
20  
21

22 In Ireland, phased containment and delay strategies were initiated on a national level in order  
23 to reduce the peak impact of the COVID-19 pandemic and slow the spread of the disease in the  
24 community. During the initial containment phase, all confirmed cases were isolated in COVID-19  
25 designated hospitals (all participating hospitals), and there were local school/business closures where  
26 there had been contact with an infected patient. Measures steadily progressed in the delay phase  
27 with the closure of all schools from 12<sup>th</sup> March and a ban on mass gatherings, closure of all pubs/bars  
28 on 16<sup>th</sup> March, progressing to other non-essential services on 25<sup>th</sup> March and a full country-wide  
29 lockdown by 28<sup>th</sup> March (**Figure 1**). Importantly, these measures were enforced at a national level  
30 without regional variability and continued for the duration of the studies period.  
31  
32  
33  
34  
35  
36  
37  
38  
39  
40  
41  
42  
43  
44

#### 45 **Statistical analysis**

46 The data collected are daily counts of ACS-PCI procedures across the five participating centres.  
47 Hence, a negative binomial model was used to compare the effect of the COVID-19 pandemic on the  
48 rate of daily interventions due to (1) STEMI, (2) NSTEMI-ACS and (3) all ACS, while allowing for over-  
49 dispersion in the daily rate of PCI procedures. Individual hospital was included as a random effect in  
50 all models, to account for clustering of data within settings. The '2020-COVID' times period is  
51 compared with the '2020-PreCOVID' and the '2019-Reference' periods and results are presented as  
52  
53  
54  
55  
56  
57  
58  
59  
60

incidence rate ratios along with corresponding 95% confidence intervals and p-values. Values below 1.0 suggest a reduction in admissions during COVID-19. Continuous variables, such as the mean daily rate of PCI cases per hospital, are presented as a mean  $\pm$  standard deviation (SD). All analyses were performed in R v3.6 (R Core Team, 2020).

## RESULTS

After the first COVID-19 case was confirmed 29<sup>th</sup> of February 2020 in Ireland, the cumulative incidence of COVID-19 confirmed cases rose above 1,000 cases by March 23<sup>th</sup> and reaching 20,612 by April 30<sup>th</sup> with 1,232 COVID-19 related deaths at that moment (**Figure 1**)[10]. For an estimated 4.90 million inhabitants, intensive care bed capacity was expanded from 255 to 411 critical care beds within the Irish public health system, with additional surge capacity of up to a total of 800 beds[15]. The number of confirmed and suspected COVID-19 cases in critical care was 160 at its maximum on April 4<sup>th</sup>, 2020[10].

During January and February 2020, the two months preceding the first confirmed COVID-19 case, 490 ACS-PCI were performed for the treatment of all categories of ACS. This compares with a total of 387 ACS-PCI cases in the succeeding two months. The mean daily rates per centre of PCI for all ACS, STEMI and NSTEMI-ACS are outlined in **Table 1**.

**Table 1. Mean and standard deviation of daily PCI procedures per centre for All ACS, NSTEMI-ACS and STEMI cases.**

| Period                     | Total | Daily mean per centre | $\pm$ SD |
|----------------------------|-------|-----------------------|----------|
| <i>All ACS</i>             |       |                       |          |
| 2020-COVID <sup>a</sup>    | 387   | 1.25                  | 1.34     |
| 2020-PreCOVID <sup>b</sup> | 490   | 1.66                  | 1.66     |

| <i>NSTE-ACS</i>             |     |      |      |
|-----------------------------|-----|------|------|
| 2020-COVID <sup>a</sup>     | 212 | 0.68 | 1.07 |
| 2020-PreCOVID <sup>b</sup>  | 288 | 0.98 | 1.29 |
| <i>STEMI</i>                |     |      |      |
| 2020-COVID <sup>a</sup>     | 175 | 0.56 | 0.77 |
| 2020-PreCOVID <sup>b</sup>  | 202 | 0.68 | 0.86 |
| 2019-Reference <sup>c</sup> | 436 | 0.73 | 0.92 |

<sup>a</sup>2020-COVID is February 29<sup>th</sup> - April 30<sup>th</sup>, 2020 (62 days);

<sup>b</sup>2020-PreCOVID is January 1<sup>st</sup> - February 28<sup>th</sup>, 2020 (59 days);

<sup>c</sup>2019-Reference is January 1<sup>st</sup> - April 30<sup>th</sup>, 2019 (120 days).

During the '2020-COVID' period, there was a 24% reduction in PCI for the treatment of all ACS as compared to the '2020-PreCOVID' period (Incidence Rate Ratio[IRR] 0.76, 95% confidence interval (CI) 0.65-0.88;  $p < 0.001$ ) (Table 2).

**Table 2. Comparison of PCI for the treatment of All ACS, NSTEMI-ACS and STEMI for the study period (2020-COVID) versus control period.**

| Period                      | Incidence rate ratio | 95% Confidence Interval | P-Value |
|-----------------------------|----------------------|-------------------------|---------|
| <i>All ACS</i>              |                      |                         |         |
| 2020-COVID to 2020-PreCOVID | 0.76                 | 0.65 – 0.88             | <0.001  |

| <i>NSTE-ACS</i>              |      |             |       |
|------------------------------|------|-------------|-------|
| 2020-COVID to 2020-PreCOVID  | 0.71 | 0.57 – 0.88 | 0.002 |
| <i>STEMI</i>                 |      |             |       |
| 2020-COVID to 2020-PreCOVID  | 0.82 | 0.67 – 1.01 | 0.061 |
| 2020-COVID to 2019-Reference | 0.78 | 0.65 – 0.93 | 0.005 |

There was a corresponding 29% reduction in PCI for the treatment of NSTE-ACS (IRR 0.71, 95% CI 0.57-0.88; p=0.002) and an 18% reduction in PCI for STEMI (IRR 0.82, 95% CI 0.67-1.01; p=0.061), as compared to the '2020-PreCOVID' period (**Table 2**). During the '2020-COVID' period there was also a 22% reduction in PCI performed for the treatment of STEMI as compared to the '2019-Reference' period (IRR 0.78, 95% CI 0.65-0.93; p=0.005) (**Table 2**).

To assess confounding of the results by seasonal variability between the '2020-PreCOVID' and '2020-COVID' period (i.e. to verify whether admissions change naturally over time), we compared the overall STEMI rate in January/February 2019 with that of March/April 2019. There was no significant variability between both periods (IRR 1.05, 95% CI 0.87-1.27; p=0.583). Results were also reproducible year on year when we considered the STEMI PCI incidence in the period of March-April 2019 as compared to the corresponding '2020-COVID' period, with a significant 24% lower PCI rate for STEMI in the '2020-COVID' period (IRR 0.76; 95% CI 0.62-0.92; p=0.006).

## DISCUSSION

This study demonstrates a substantial reduction in PCI procedures performed for the treatment of all ACS, NSTEMI-ACS and STEMI during the initial stages of the COVID-19 pandemic in Ireland. During the two months since the first confirmed COVID-19 case, PCI rates for the treatment of all ACS, NSTEMI-ACS and STEMI dropped by 24%, 29% and 18%, respectively, with respect to the prior two months (**Figure 1**) (**Figure 2**). As compared to the 2019 reference period, there was a 22% reduction of PCI for STEMI during the '2020-COVID' period (**Figure 3**).

These data correspond with data from other countries detailing similar reductions in STEMI cases and ACS hospital admissions[3-8]. Unlike these studies, we highlight the impact of COVID-19 on the actual number of PCI procedures performed for the treatment of all ACS since the COVID-19 outbreak. This data is of particular relevance as it seems the pandemic affects both the number of patients presenting to hospital with ACS as well as the number of patients that undergo PCI as a treatment for ACS. Since coronary revascularisation has a proven survival benefit in the treatment of both STEMI and NSTEMI-ACS, this raises concern for incremental cardiac morbidity and mortality during the initial phases of the COVID-19 pandemic.

It is difficult to fully account for this sudden and significant drop in PCI performed for the treatment of ACS among these primary PCI centres. In Ireland, where the healthcare system was not overwhelmed by COVID-19 cases, the emergency departments and primary PCI facilities remained operational without any capacity limitation. It is also unlikely that the observed reduction in ACS treatments could be fully explained by changes in lifestyle or environmental factors, such as workplace stressors or exposure to air pollution, factors that have previously been associated with ACS.

It is quite likely that the true incidence of ACS in the population has remained largely unchanged during the COVID-19 pandemic, rather, that the proportion of patients presenting to the hospital has fallen. A major concern exists that a large proportion of ACS patients may not be presenting, or delaying their presentation, to health care facilities despite measures to preserve the function and capacity of emergency departments and acute cardiac facilities in Ireland. The Irish

1  
2  
3 Cardiac Society conducted a survey among cardiologists at the height of the pandemic, and reported  
4 that the reduction in ACS presentations to hospitals were attributed to: (1) people's fear of being  
5 exposed to COVID-19 within a healthcare facility (97%); (2) people not leaving their homes due to the  
6 government restrictions (41%); and, (3) people worried about putting a burden on the health services  
7 (41%)[16]. Fear for the healthcare environment as well as unawareness of the risk-mitigation efforts  
8 set up by the hospitals, were the overarching themes reported by patients in a series of semi-  
9 structured interviews performed during the pandemic in an American population[17]. Indeed, in  
10 relation to these latter assertions, cumulative incidence of PCI rates for ACS suggest further diverging  
11 of the curves the moment social distancing and lockdown measures were put in place, two weeks  
12 after the first confirmed COVID-19 case (**Figure 1**).

13  
14  
15  
16  
17  
18  
19  
20  
21  
22  
23  
24  
25  
26  
27  
28  
29  
30  
31  
32  
33  
34  
35  
36  
37  
38  
39  
40  
41  
42  
43  
44  
45  
46  
47  
48  
49  
50  
51  
52  
53  
54  
55  
56  
57  
58  
59  
60

Anecdotal evidence suggests that the reduction/delay in presenting to hospital with ACS during the COVID-19 era has resulted in an increase in the proportion of mechanical complications[18]. Given the reduction in acute coronary revascularisation observed in the current study and assuming the true incidence of ACS has not changed significantly, it is possible that we will yet see a future wave of new post myocardial infarction induced heart failure presentations or arrhythmias leading to further morbidity and mortality. It will take a significant period of time before the true measure of effect of this pandemic in a cardiovascular sense is known and we will need to monitor excess mortality figures to assess for this indirect impact caused by this pandemic.

Our study has limitations. First, we were only able to include five of six Primary PCI centres in Ireland. The participating centres however, account for more than three quarters of all STEMI presentations in Ireland. Herein, we present the daily numbers of PCI procedures for the treatment of ACS, rather than hospital admission for PCI. Using ACS-related PCI activity could underestimate the true incidence of ACS presenting to hospitals due to alterations in clinical practice patterns, such as an increased use of non-invasive strategies. However, our objective was to evaluate the patterns of invasive treatment of ACS during the COVID-19 pandemic. Further information on the number of ACS

1  
2  
3 presentations to the participating hospitals that were treated non-invasively are not available.  
4  
5 Additional demographic, clinical, or mortality data on participating patients was not collected.  
6  
7  
8  
9

10 In conclusion, we report a one quarter reduction in PCI for ACS during the COVID-19 pandemic  
11 in an affected, but not overwhelmed, European health-care system. Reasons for this reduction are  
12 numerous and varied. Clear public health messaging and measures are required to encourage patients  
13  
14  
15  
16  
17 to seek medical attention for non-COVID-19 related illness.  
18  
19  
20  
21  
22  
23  
24

#### 25 **FUNDING STATEMENT**

26 'This research received no specific grant from any funding agency in the public, commercial  
27 or not-for-profit sectors'.  
28  
29  
30  
31  
32  
33

#### 34 **AUTHOR CONTRIBUTIONS**

- 35  
36 • Niall P Connolly, Darren Mylotte, Liesbeth Rosseel; formed the concept, designed, wrote and  
37 revised the paper.
- 38  
39 • Andrew J Simpkin; statistical analysis, graphics, critical revision of the paper for important  
40 intellectual content, final approval of the version to be published.
- 41  
42 • James Crowley, Stephen O'Connor, Khalid AlHarbi, Thomas J Kiernan, Sacchin Arockiam,  
43 Patrick Owens, Amal John, Gavin J Blake, Sean Fitzgerald, Diarmaid Cadogan; data acquisition,  
44 critical revision of the paper for important intellectual content, final approval of the version  
45 to be published.
- 46  
47 • All authors agree to be accountable for all aspects of the work in ensuring that questions  
48 related to the accuracy or integrity of any part of the work are appropriately investigated and  
49 resolved.  
50  
51  
52  
53  
54  
55  
56  
57  
58  
59  
60

## REFERENCES

1. Smeeth L, Thomas SL, Hall AJ et al. Risk of myocardial infarction and stroke after acute infection or vaccination. *N Engl J Med* 2004 Dec 16;351(25):2611-8.  
doi:10.1056/NEJMoa041747
2. Kwong, JC, Schwartz KL, Campitelli MA et al. Acute Myocardial Infarction after Laboratory-Confirmed Influenza Infection. *N Engl J Med* 2018 Jan 25;378(4):345-353. doi:10.1056/nejmoa1702090
3. Garcia S, Albaghdadi MS, Meraj PM et al. Reduction in ST-Segment Elevation Cardiac Catheterization Laboratory Activations in the United States during COVID-19 Pandemic. *J Am Coll Cardiol*. 2020 Apr 9. pii: S0735-1097(20)34913-5. doi: 10.1016/j.jacc.2020.04.011.[Epub ahead of print]
4. De Filippo O, D'Ascenzo F, Angelini F et al. Reduced Rate of Hospital Admissions for ACS during COVID-19 Outbreak in Northern Italy. *N Engl J Med*. 2020 Apr 28. doi: 10.1056/NEJMc2009166.[Epub ahead of print]
5. Rodríguez-Leor O, Cid-Álvarez B, Ojeda S et al. Impacto de la pandemia de COVID-19 sobre la actividad asistencial en cardiología intervencionista en España. *REC Interv Cardiol*. 2020;2:82-89. doi:10.24875/RECIC.M20000120
6. Rangé G, Hakim R, Motreff P. Where have the STEMIs gone during COVID-19 lockdown? *Eur Heart J Qual Care Clin Outcomes*. 2020 Apr 29. pii: qcaa034. doi: 10.1093/ehjqcco/qcaa034.[Epub ahead of print]
7. De Rosa SC, Spaccarotella C, Basso C et al. Reduction of Hospitalizations for Myocardial Infarction in Italy in the COVID-19 Era. *Eur Heart J*. 2020 May 15;ehaa409. doi: 10.1093/eurheartj/ehaa409. Online ahead of print.
8. Metzler B, Siostrzonek P, Binder RK et al. Decline of Acute Coronary Syndrome Admissions in Austria Since the Outbreak of COVID-19: The Pandemic Response Causes Cardiac Collateral Damage. *Eur Heart J*. 2020 May 14;41(19):1852-1853. doi: 10.1093/eurheartj/ehaa314.



- 1  
2  
3 9. Neumann FJ, Sousa-Uva M, Ahlsson A et al; ESC Scientific Document Group. 2018 ESC/EACTS  
4 Guidelines on myocardial revascularization. Eur Heart J. 2019 Jan 7;40(2):87-165. doi:  
5  
6 10.1093/eurheartj/ehy394. PMID: 30165437.  
7  
8
- 9  
10 10. Department of Health, Ireland. Latest updates on COVID-19 (Coronavirus).  
11  
12 <https://www.gov.ie/en/news/7e0924-latest-updates-on-covid-19-coronavirus/> (04 June  
13  
14 2020)  
15
- 16 11. Health Service Executive, Ireland. National Clinical Programmes – Acute Coronary Syndrome.  
17  
18 <https://www.hse.ie/eng/about/who/cspd/ncps/acs/> (24 May 2020)  
19  
20
- 21 12. Health Service Executive, Ireland. Report of the National Clinical Programme for Acute  
22  
23 Coronary Syndrome (ACS) on standardising treatment of patients with STEMI in 2016.  
24  
25 [https://www.hse.ie/eng/about/who/cspd/ncps/acs/resources/heart-attack-care-in-  
26  
27 2016.pdf/](https://www.hse.ie/eng/about/who/cspd/ncps/acs/resources/heart-attack-care-in-2016.pdf/) (4 June 2020)  
28  
29
- 30 13. Ibanez B, James S, Agewall S et al; ESC Scientific Document Group. 2017 ESC Guidelines for  
31  
32 the management of acute myocardial infarction in patients presenting with ST-segment  
33  
34 elevation: The Task Force for the management of acute myocardial infarction in patients  
35  
36 presenting with ST-segment elevation of the European Society of Cardiology (ESC). Eur Heart  
37  
38 J. 2018 Jan 7;39(2):119-177. doi: 10.1093/eurheartj/ehx393. PMID: 28886621.  
39  
40
- 41 14. Roffi M, Patrono C, Collet JP et al; ESC Scientific Document Group. 2015 ESC Guidelines for  
42  
43 the management of acute coronary syndromes in patients presenting without persistent ST-  
44  
45 segment elevation: Task Force for the Management of Acute Coronary Syndromes in  
46  
47 Patients Presenting without Persistent ST-Segment Elevation of the European Society of  
48  
49 Cardiology (ESC). Eur Heart J. 2016 Jan 14;37(3):267-315. doi: 10.1093/eurheartj/ehv320.  
50  
51 Epub 2015 Aug 29. PMID: 26320110.  
52  
53
- 54 15. Central Statistics Office, Ireland. Population and Labour Force Projections 2017 – 2051.  
55  
56 <https://www.cso.ie/en/releasesandpublications/ep/p->  
57  
58  
59  
60

1  
2  
3 plfp/populationandlabourforceprojections2017-2051/populationprojectionsresults/ (04 Jun  
4  
5 2020)

- 6  
7  
8 16. Irish Cardiac Society. Acute Coronary Syndromes activity during COVID-19 Irish Cardiac  
9  
10 Society Survey, April 2020. Dublin: Irish Cardiac Society; 2020  
11  
12 17. Wong LE, Hawkins JE, Langness S et al. Where are all the patients? Addressing Covid-19 fear  
13  
14 to encourage sick patients to seek emergency care. NEJM Catalyst Innovations in Care  
15  
16 Delivery. 2020;1:3 doi: 10.1056/CAT.20.0193  
17  
18 18. Moroni F, Gramegna M, Ajello S et al. Collateral damage: medical care avoidance behavior  
19  
20 among patients with acute coronary syndrome during the COVID-19 pandemic, JACC Case  
21  
22 Reports (2020), doi: [https:// doi.org/10.1016/j.jaccas.2020.04.010](https://doi.org/10.1016/j.jaccas.2020.04.010).  
23  
24  
25  
26  
27  
28  
29  
30  
31  
32  
33  
34  
35  
36  
37  
38  
39  
40  
41  
42  
43  
44  
45  
46  
47  
48  
49  
50  
51  
52  
53  
54  
55  
56  
57  
58  
59  
60

### **FIGURE LEGENDS**

**Figure 1. Panel A** the cumulative incidence of PCI procedures for the treatment of All ACS is demonstrated during two months preceding (yellow) and succeeding (red) the first confirmed COVID-19 case in Ireland over time; **Panel B**, the daily new confirmed COVID-19 cases in Ireland with the orange line representing the locally smoothed trend; **Panel C**, The locally smoothed trend of COVID-19 daily new hospital and ICU admissions and confirmed/suspected deaths over time in Ireland; the orange dotted line in panel A, B and C represents the national closure of schools (13<sup>th</sup> March), the red dotted line represents the date of full lockdown implementation (28<sup>th</sup> March). (PCI, percutaneous coronary intervention; ACS, acute coronary syndrome; ICU, intensive care unit)

**Figure 2. Cumulative incidence of PCI procedures for the treatment of NSTEMI-ACS and STEMI during the 2020-COVID period and the 2020-PreCOVID period. Panel A** shows the overall cumulative incidence of PCI performed for the treatment of NSTEMI-ACS during 2020-PreCOVID (yellow) and 2020-COVID (red); In **Panel B** the overall cumulative incidence of PCI performed for the treatment of STEMI during the 2020-PreCOVID (yellow) and 2020-COVID periods (red) is shown; the orange dotted line in panel A and B represents the national closure of schools, the red dotted line represents the date of full lockdown implementation. (PCI, percutaneous coronary intervention; NSTEMI-ACS, non-ST elevation acute coronary syndrome; STEMI, ST-elevation myocardial infarction).

**Figure 3. Cumulative incidence of PCI procedures for the treatment of STEMI comparing 2019 to 2020.** The cumulative incidence of PCI procedures for the treatment of STEMI comparing January to April 2019 (yellow) to the same period in 2020 (red); the orange dotted line represents the national closure of schools, the red dotted line represents the date of full lockdown implementation. (PCI, percutaneous coronary intervention; STEMI, ST-elevation myocardial infarction)

1  
2  
3 **DATA AVAILABILITY STATEMENT**  
4

5 The data underlying this article will be shared on reasonable request to the corresponding author.  
6  
7  
8  
9  
10  
11  
12  
13  
14  
15  
16  
17  
18  
19  
20  
21  
22  
23  
24  
25  
26  
27  
28  
29  
30  
31  
32  
33  
34  
35  
36  
37  
38  
39  
40  
41  
42  
43  
44  
45  
46  
47  
48  
49  
50  
51  
52  
53  
54  
55  
56  
57  
58  
59  
60

For peer review only

## Text Tables.

**Table 1. Mean and standard deviation of daily PCI procedures per centre for All ACS, NSTEMI-ACS and STEMI cases.**

| Period                      | Total | Daily mean per centre | ±SD  |
|-----------------------------|-------|-----------------------|------|
| <i>All ACS</i>              |       |                       |      |
| 2020-COVID <sup>a</sup>     | 387   | 1.25                  | 1.34 |
| 2020-PreCOVID <sup>b</sup>  | 490   | 1.66                  | 1.66 |
| <i>NSTEMI-ACS</i>           |       |                       |      |
| 2020-COVID <sup>a</sup>     | 212   | 0.68                  | 1.07 |
| 2020-PreCOVID <sup>b</sup>  | 288   | 0.98                  | 1.29 |
| <i>STEMI</i>                |       |                       |      |
| 2020-COVID <sup>a</sup>     | 175   | 0.56                  | 0.77 |
| 2020-PreCOVID <sup>b</sup>  | 202   | 0.68                  | 0.86 |
| 2019-Reference <sup>c</sup> | 436   | 0.73                  | 0.92 |

<sup>a</sup>2020-COVID is February 29<sup>th</sup> - April 30<sup>th</sup>, 2020 (62 days);

<sup>b</sup>2020-PreCOVID is January 1<sup>st</sup> - February 28<sup>th</sup>, 2020 (59 days);

<sup>c</sup>2019-Reference is January 1<sup>st</sup> - April 30<sup>th</sup>, 2019 (120 days).

(PCI, percutaneous coronary intervention; ACS, Acute coronary syndrome; NSTEMI-ACS, non-ST elevation acute coronary syndrome; STEMI, ST-elevation Myocardial Infarction)

**Table 2. Comparison of PCI for the treatment of All ACS, NSTEMI-ACS and STEMI for the study period (2020-COVID) versus control period.**

| Period                       | Incidence rate ratio | 95% Confidence Interval | P-Value |
|------------------------------|----------------------|-------------------------|---------|
| <i>All ACS</i>               |                      |                         |         |
| 2020-COVID to 2020-PreCOVID  | 0.76                 | 0.65 – 0.88             | <0.001  |
| <i>NSTEMI-ACS</i>            |                      |                         |         |
| 2020-COVID to 2020-PreCOVID  | 0.71                 | 0.57 – 0.88             | 0.002   |
| <i>STEMI</i>                 |                      |                         |         |
| 2020-COVID to 2020-PreCOVID  | 0.82                 | 0.67 – 1.01             | 0.061   |
| 2020-COVID to 2019-Reference | 0.78                 | 0.65 – 0.93             | 0.005   |

(PCI, percutaneous coronary intervention; ACS, Acute coronary syndrome; NSTEMI-ACS, non-ST elevation acute coronary syndrome; STEMI, ST-elevation Myocardial Infarction)

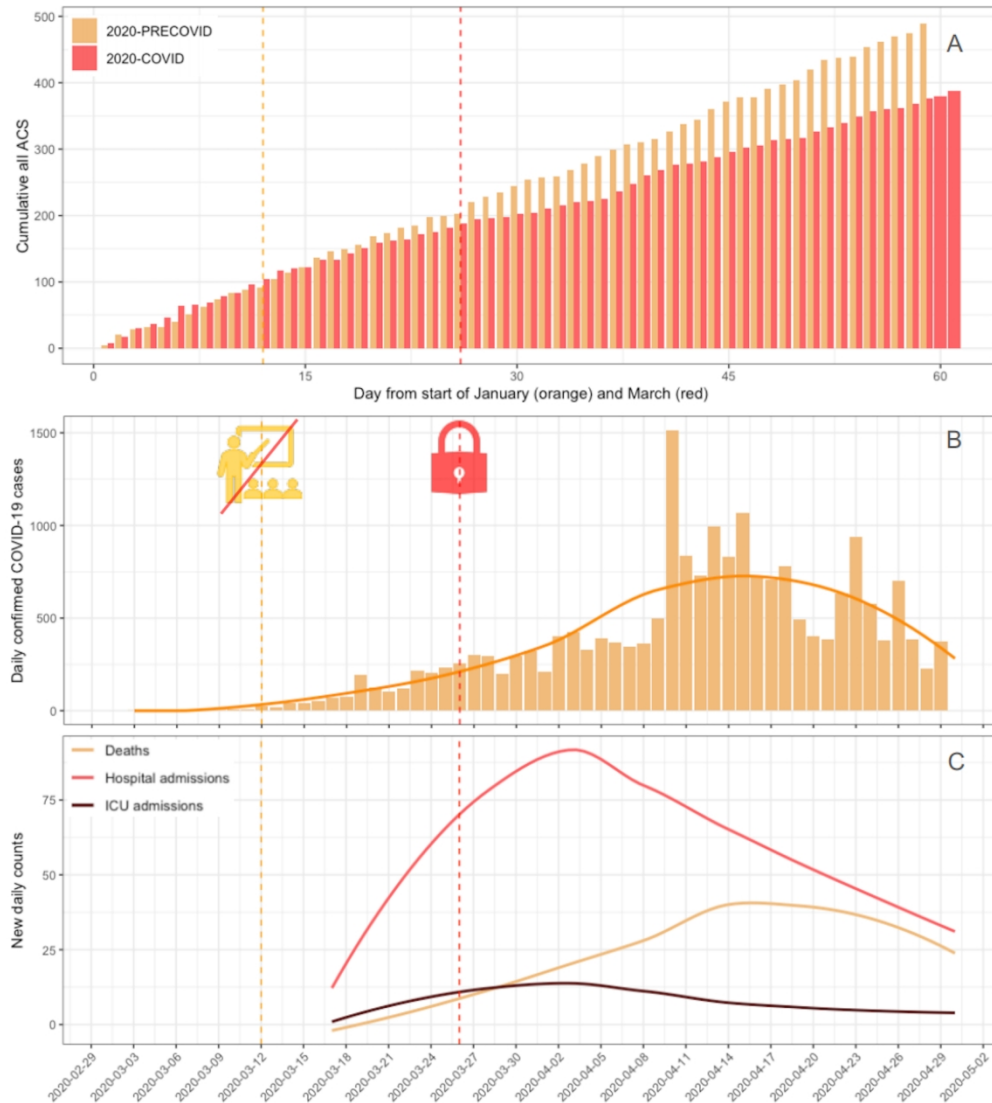

Figure 1. Panel A the cumulative incidence of PCI procedures for the treatment of All ACS is demonstrated during two months preceding (yellow) and succeeding (red) the first confirmed COVID-19 case in Ireland over time; Panel B, the daily new confirmed COVID-19 cases in Ireland with the orange line representing the locally smoothed trend; Panel C, The locally smoothed trend of COVID-19 daily new hospital and ICU admissions and confirmed/suspected deaths over time in Ireland; the orange dotted line in panel A, B and C represents the national closure of schools (13th March), the red dotted line represents the date of full lockdown implementation (28th March). (PCI, percutaneous coronary intervention; ACS, acute coronary syndrome; ICU, intensive care unit)

150x165mm (300 x 300 DPI)

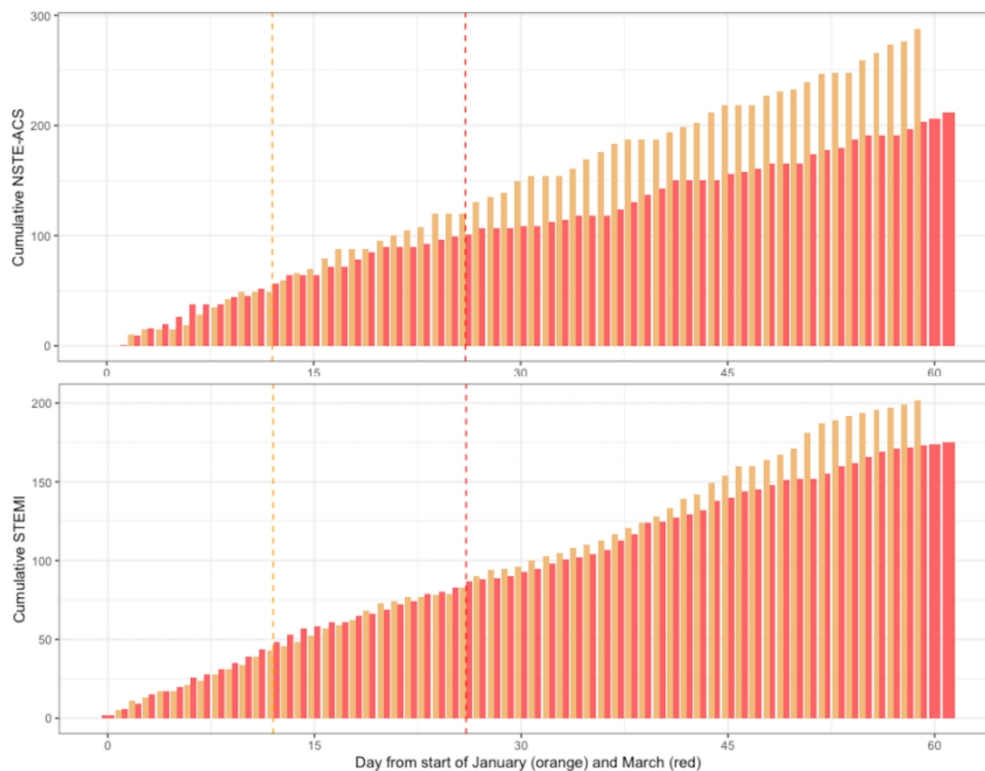

Figure 2. Cumulative incidence of PCI procedures for the treatment of NSTEMI-ACS and STEMI during the 2020-COVID period and the 2020-PreCOVID period. Panel A shows the overall cumulative incidence of PCI performed for the treatment of NSTEMI-ACS during 2020-PreCOVID (yellow) and 2020-COVID (red); In Panel B the overall cumulative incidence of PCI performed for the treatment of STEMI during the 2020-PreCOVID (yellow) and 2020-COVID periods (red) is shown; the orange dotted line in panel A and B represents the national closure of schools, the red dotted line represents the date of full lockdown implementation. (PCI, percutaneous coronary intervention; NSTEMI-ACS, non-ST elevation acute coronary syndrome; STEMI, ST-elevation myocardial infarction).

150x115mm (300 x 300 DPI)



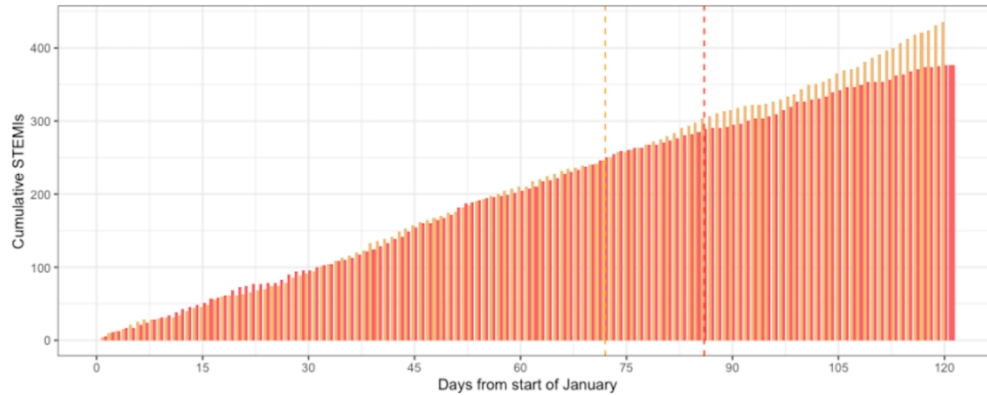

Figure 3. Cumulative incidence of PCI procedures for the treatment of STEMI comparing 2019 to 2020. The cumulative incidence of PCI procedures for the treatment of STEMI comparing January to April 2019 (yellow) to the same period in 2020 (red); the orange dotted line represents the national closure of schools, the red dotted line represents the date of full lockdown implementation. (PCI, percutaneous coronary intervention; STEMI, ST-elevation myocardial infarction)

150x60mm (300 x 300 DPI)

# BMJ Open

## Impact on Percutaneous Coronary Intervention for Acute Coronary Syndromes during the COVID-19 outbreak in a non-overwhelmed European health care system: COVID ACS-PCI Experience in Ireland

|                                 |                                                                                                                                                                                                                                                                                                                                                                                                                                                                                                                                                                                                                                                                                                                                                                                                                                                                                                                                                                                                                                                                                                                                                                                                   |
|---------------------------------|---------------------------------------------------------------------------------------------------------------------------------------------------------------------------------------------------------------------------------------------------------------------------------------------------------------------------------------------------------------------------------------------------------------------------------------------------------------------------------------------------------------------------------------------------------------------------------------------------------------------------------------------------------------------------------------------------------------------------------------------------------------------------------------------------------------------------------------------------------------------------------------------------------------------------------------------------------------------------------------------------------------------------------------------------------------------------------------------------------------------------------------------------------------------------------------------------|
| Journal:                        | <i>BMJ Open</i>                                                                                                                                                                                                                                                                                                                                                                                                                                                                                                                                                                                                                                                                                                                                                                                                                                                                                                                                                                                                                                                                                                                                                                                   |
| Manuscript ID                   | bmjopen-2020-045590.R1                                                                                                                                                                                                                                                                                                                                                                                                                                                                                                                                                                                                                                                                                                                                                                                                                                                                                                                                                                                                                                                                                                                                                                            |
| Article Type:                   | Original research                                                                                                                                                                                                                                                                                                                                                                                                                                                                                                                                                                                                                                                                                                                                                                                                                                                                                                                                                                                                                                                                                                                                                                                 |
| Date Submitted by the Author:   | 25-Feb-2021                                                                                                                                                                                                                                                                                                                                                                                                                                                                                                                                                                                                                                                                                                                                                                                                                                                                                                                                                                                                                                                                                                                                                                                       |
| Complete List of Authors:       | <p>Connolly, Niall; Galway University Hospitals, Dept. of Cardiology<br/> Simpkin, Andrew; National University of Ireland Galway, School of Medicine<br/> Mylotte, Darren; Galway University Hospitals, Dept. of Cardiology<br/> Crowley, James; Galway University Hospitals, Dept. of Cardiology;<br/> National University of Ireland Galway, School of Medicine<br/> O'Connor, Stephen; St. James' Hospital, Dublin, Dept. of Cardiology<br/> AlHarbi, Khalid; St. James' Hospital, Dublin, Dept. of Cardiology<br/> Kiernan, Thomas; University of Limerick; University Hospital Limerick,<br/> Dept. of Cardiology<br/> Arockiam, Sacchin; University Hospital Limerick, Dept. of Cardiology<br/> Owens, Patrick; University Hospital Waterford, Dept. of Cardiology<br/> John, Amal; University Hospital Waterford, Dept. Of Cardiology<br/> Blake, Gavin; Mater Misericordiae University Hospital, Dept. of<br/> Cardiology<br/> Fitzgerald, Sean; Mater Misericordiae University Hospital, Dept. of<br/> Cardiology<br/> Cadogan, Diarmaid; Mater Misericordiae University Hospital, Dept. of<br/> Cardiology<br/> Rosseel, Liesbeth; Galway University Hospitals, Dept. of Cardiology</p> |
| <b>Primary Subject Heading</b>: | Cardiovascular medicine                                                                                                                                                                                                                                                                                                                                                                                                                                                                                                                                                                                                                                                                                                                                                                                                                                                                                                                                                                                                                                                                                                                                                                           |
| Secondary Subject Heading:      | Infectious diseases                                                                                                                                                                                                                                                                                                                                                                                                                                                                                                                                                                                                                                                                                                                                                                                                                                                                                                                                                                                                                                                                                                                                                                               |
| Keywords:                       | COVID-19, Ischaemic heart disease < CARDIOLOGY, Coronary intervention < CARDIOLOGY, PUBLIC HEALTH                                                                                                                                                                                                                                                                                                                                                                                                                                                                                                                                                                                                                                                                                                                                                                                                                                                                                                                                                                                                                                                                                                 |
|                                 |                                                                                                                                                                                                                                                                                                                                                                                                                                                                                                                                                                                                                                                                                                                                                                                                                                                                                                                                                                                                                                                                                                                                                                                                   |

SCHOLARONE™  
Manuscripts



I, the Submitting Author has the right to grant and does grant on behalf of all authors of the Work (as defined in the below author licence), an exclusive licence and/or a non-exclusive licence for contributions from authors who are: i) UK Crown employees; ii) where BMJ has agreed a CC-BY licence shall apply, and/or iii) in accordance with the terms applicable for US Federal Government officers or employees acting as part of their official duties; on a worldwide, perpetual, irrevocable, royalty-free basis to BMJ Publishing Group Ltd ("BMJ") its licensees and where the relevant Journal is co-owned by BMJ to the co-owners of the Journal, to publish the Work in this journal and any other BMJ products and to exploit all rights, as set out in our [licence](#).

The Submitting Author accepts and understands that any supply made under these terms is made by BMJ to the Submitting Author unless you are acting as an employee on behalf of your employer or a postgraduate student of an affiliated institution which is paying any applicable article publishing charge ("APC") for Open Access articles. Where the Submitting Author wishes to make the Work available on an Open Access basis (and intends to pay the relevant APC), the terms of reuse of such Open Access shall be governed by a Creative Commons licence – details of these licences and which [Creative Commons](#) licence will apply to this Work are set out in our licence referred to above.

Other than as permitted in any relevant BMJ Author's Self Archiving Policies, I confirm this Work has not been accepted for publication elsewhere, is not being considered for publication elsewhere and does not duplicate material already published. I confirm all authors consent to publication of this Work and authorise the granting of this licence.

1  
2  
3 **Impact on Percutaneous Coronary Intervention for Acute Coronary Syndromes during the COVID-**  
4  
5 **19 outbreak in a non-overwhelmed European health care system: COVID ACS-PCI Experience in**  
6  
7 **Ireland**  
8

9  
10 Niall P Connolly<sup>1</sup>, Andrew J Simpkin<sup>2</sup>, Darren Mylotte<sup>1</sup>, James Crowley<sup>1,2</sup>, Stephen O'Connor<sup>3</sup>, Khalid  
11 AlHarbi<sup>3</sup>, Thomas J Kiernan<sup>4</sup>, Sacchin Arockiam<sup>4</sup>, Patrick Owens<sup>5</sup>, Amal John<sup>5</sup>, Gavin J Blake<sup>6</sup>, Sean  
12 Fitzgerald<sup>6</sup>, Diarmaid Cadogan<sup>6</sup>, Liesbeth Rosseel<sup>1</sup>  
13  
14  
15

16  
17  
18  
19 <sup>1</sup> Department of Cardiology, Galway University Hospital, Ireland

20  
21 <sup>2</sup> School of Medicine, National University of Ireland Galway, Ireland

22  
23 <sup>3</sup> Department of Cardiology, St James' Hospital, Dublin, Ireland

24  
25 <sup>4</sup> Department of Cardiology, University Hospital Limerick, Ireland

26  
27 <sup>5</sup> Department of Cardiology, University Hospital Waterford, Ireland

28  
29 <sup>6</sup> Department of Cardiology, Mater Misericordiae University Hospital Dublin, Ireland  
30  
31  
32

33  
34 Word Count: 2479 (excluding abstract, summary, figures, tables, legends and references)  
35

36  
37 Figures: 3  
38

39  
40 Tables: 2

41  
42 Keywords: COVID-19, percutaneous coronary intervention, acute coronary syndrome, Ireland

43  
44 Conflicts of interest: Darren Mylotte is a consultant for Medtronic, Boston Scientific, and Microport.  
45

46  
47 The other authors have no conflicts of interest to declare.  
48  
49

50  
51 Corresponding Author:

52 Niall Connolly

53 Department of Cardiology

54 Galway University Hospital

55 Newcastle Road, Galway, Ireland

56  
57  
58 Mail: [niallcon@gmail.com](mailto:niallcon@gmail.com)  
59  
60

**ABSTRACT:****Aims**

To evaluate temporal trends of acute coronary syndromes (ACS) treated via percutaneous coronary intervention (PCI) throughout the COVID-19 outbreak in a European healthcare system affected but not overwhelmed by COVID-19 related pathology.

**Methods and Results**

We performed a retrospective multicentre analysis of the rates of PCI for the treatment of ACS within the period two months pre and post the first confirmed COVID-19 case in Ireland, as well as comparing PCI for ST-Elevation Myocardial Infarction (STEMI) with the corresponding period in 2019. During the 2020-COVID period (29<sup>th</sup> February – 30<sup>th</sup> April 2020) there was a 24% decline in PCI for overall ACS (incidence rate ratio (IRR) 0.76; 95% confidence interval (CI) 0.65-0.88; P<0.001), including a 29% reduction in PCI for Non-ST Elevation-ACS (IRR 0.71; 95% CI 0.57-0.88; P=0.002) and an 18% reduction in PCI for STEMI (IRR 0.82; 95% CI 0.67-1.01; P=0.061), as compared to the 2020-PreCOVID period (January 1<sup>st</sup> - February 28<sup>th</sup> 2020). A 22% (IRR 0.78; 95% CI 0.65-0.93; P=0.005) reduction of PCI for STEMI was seen as compared with the 2019 reference period.

**Conclusion**

This study demonstrates a significant reduction in PCI procedures for the treatment of ACS since the COVID-19 outbreak in Ireland. The reasons for this decline are still unclear but patients need to be encouraged to seek medical attention when cardiac symptoms appear, in order to avoid incremental cardiac morbidity and mortality due to a reduction in coronary revascularisation for the treatment of ACS.

**Keywords:** COVID-19, coronary intervention, ischaemic heart disease, public health

## ARTICLE SUMMARY

### Strengths and limitations of the study:

- This is a retrospective multicentre analysis of the temporal trends of acute coronary syndromes (ACS) treated via percutaneous coronary intervention (PCI) throughout the initial COVID-19 outbreak in Ireland.
- The participating centres account for 79.6% of all STEMI presentations in Ireland giving a very good representation of the overall national picture.
- The figures represent daily numbers of PCI procedures for the treatment of ACS, rather than hospital admission for PCI which could underestimate the true incidence of ACS presenting to hospitals due to alterations in clinical practice patterns, such as a potential for increased use of non-invasive strategies.
- The analysis was performed inter-year and intra-year thus allowing the assessment for confounding by seasonable variations in presentations with ACS.
- The overall impact on cardiovascular and mortality hard outcomes are not currently measurable within the remit of this study.
- Detailed demographic information including socio-economic status, age, gender and comorbidities was not available for analysis.

1  
2  
3 **Text:**  
4  
5  
6

7 **INTRODUCTION**  
8

9  
10 The Coronavirus disease 2019 (COVID-19) pandemic has brought many challenges for  
11 healthcare systems and has had a huge impact on social behaviour. To minimise the spread of  
12 infection social distancing measures and wide restrictions in the movement of people have been  
13 implemented. Intermittent deferral of non-urgent and elective care has been a central tenet to  
14 increase hospital capacity to deal with the surge in COVID-19 cases and to avoid unnecessary exposure  
15 of patients to a hospital environment where COVID-19 may be more prevalent.  
16  
17  
18  
19  
20  
21  
22

23 Initial expectations would have been for an increase in acute coronary syndrome (ACS)  
24 presentations in line with existing evidence suggesting a link between respiratory infections and  
25 subsequent myocardial infarction[1,2]. However, first reports during the initial phase of the COVID-19  
26 outbreak showed a decline in presentations of ST-elevation myocardial infarction (STEMI) and hospital  
27 admissions for ACS, even in geographies where the health care system was not overwhelmed by  
28 COVID-19 pathology[3-8]. As percutaneous coronary intervention (PCI) has a proven beneficial  
29 outcome in the management of ACS, there is a concern that a similar decline in PCI procedures during  
30 the COVID-19 pandemic could lead to incremental cardiac morbidity and mortality[9].  
31  
32  
33  
34  
35  
36  
37  
38  
39  
40

41 This study represents data from the Republic of Ireland, a European country where  
42 widespread social and lockdown measures were implemented during the first wave of the COVID-19  
43 outbreak, and the healthcare system has been affected, but not overwhelmed by COVID-19 related  
44 pathology. Our goal is to evaluate temporal trends of acute coronary syndromes treated via  
45 percutaneous coronary intervention during and before the COVID-19 outbreak in a European  
46 healthcare system affected but not overwhelmed by COVID-19 related pathology.  
47  
48  
49  
50  
51  
52  
53  
54  
55  
56  
57  
58  
59  
60

## **METHODS**

In this multicentre retrospective registry, we examine the daily rates of PCI performed for the treatment of ACS during three different time periods in relation to the COVID-19 outbreak in Ireland. Participation was voluntary and data was anonymously collected by each participating centre in a dedicated electronic dataset. Cases were identified by combining cardiac catheterisation laboratory records showing performed PCI and hospital admission records. The data was cross-referenced with patient's paper and electronic records to provide accurate descriptors of the indication for PCI based on ESC defined diagnoses. Variables were categorised according to the indication and timing of PCI. National data regarding the COVID-19 outbreak were collected from the official Department of Health resources[10]. Ethical approval for the study was gained from the National Research Ethics Committee (NREC) established for COVID-19 related research in Ireland.

### **Patient and Public Involvement**

Patients or the public were not involved in the design, or conduct, or reporting, or dissemination plans of our research

### **Study Population**

The Health Service Executive (HSE) dedicated ACS Programme designates six primary PCI centres in Ireland[11]. In this study the data are collected from five primary PCI facilities (Galway University Hospitals, Mater Misericordiae University Hospital Dublin, St. James's Hospital Dublin, University Hospital Limerick and Waterford University Hospital). The five participating centres in this study account for 79.7% of all STEMI presentations in Ireland (est. population 4.90 million in 2020) based on the latest published national data[12,13]. This study does not include any private health care facilities which also treat non-ST elevation acute coronary syndromes (NSTEMI-ACS) during office hours, but not STEMI cases.



## Definitions

The daily rates of PCI procedures performed only for the treatment of ACS (ACS-PCI) during three delineated time periods were included in this study. The overall PCI group ('All ACS') was dichotomised into two groups, as defined by the European Society of Cardiology guidelines: (1) 'STEMI', and, (2) 'NSTEMI-ACS', with the latter representing PCI performed for both non-ST elevation myocardial infarction (NSTEMI) and unstable angina (UA)[14,15]. Daily ACS-PCI rates were collected for three separate time periods: (1) the '2020-COVID' period, was set from the date of the first confirmed COVID-19 case in Ireland, February 29<sup>th</sup> 2020, until April 30<sup>th</sup> 2020 (62 days); (2) the '2020-PreCovid' including January 1<sup>st</sup> to February 28<sup>th</sup> 2020 (59 days); and, (3) the '2019-Reference' period covering January to April 2019 (120 days). Daily PCI rates for STEMI were collected for the '2019-Reference', '2020-PreCOVID' and the '2020-COVID' periods, whilst data regarding PCI performed for the treatment of NSTEMI-ACS were collected for the '2020-PreCOVID' and '2020-COVID' periods.

In Ireland, phased containment and delay strategies were initiated on a national level in order to reduce the peak impact of the COVID-19 pandemic and slow the spread of the disease in the community. During the initial containment phase, all confirmed cases were isolated in COVID-19 designated hospitals (all participating hospitals), and there were local school/business closures where there had been contact with an infected patient. Measures steadily progressed in the delay phase with the closure of all schools from 13<sup>th</sup> March and a ban on mass gatherings, closure of all pubs/bars on 16<sup>th</sup> March, progressing to other non-essential services on 25<sup>th</sup> March and a full country-wide lockdown by 28<sup>th</sup> March (**Figure 1**). Importantly, these measures were enforced at a national level without regional variability and continued for the duration of the studied period.

## Statistical analysis

The data collected are daily counts of ACS-PCI procedures across the five participating centres. Hence, a negative binomial model was used to compare the effect of the COVID-19 pandemic on the

1  
2  
3 rate of daily interventions due to (1) STEMI, (2) NSTEMI-ACS and (3) all ACS, while allowing for over-  
4 dispersion in the daily rate of PCI procedures. Individual hospital was included as a random effect in  
5 all models, to account for clustering of data within settings. The '2019-Reference' and the '2020-  
6 PreCOVID' periods are compared with the more recent '2020-COVID' time period. Results are  
7 presented as incidence rate ratios (IRR) along with corresponding 95% confidence intervals and p-  
8 values. The IRR represents the ratio of the current rate of PCI relative to the preceding rate. IRR values  
9 below 1.0 suggest a reduction in PCI over time, whereas values above 1.0 would suggest an increase  
10 in PCI. Continuous variables, such as the mean daily rate of PCI cases per hospital, are presented as a  
11 mean  $\pm$  standard deviation (SD). All analyses were performed in R v3.6 (R Core Team, 2020).  
12  
13  
14  
15  
16  
17  
18  
19  
20  
21  
22  
23  
24  
25  
26

## 27 **RESULTS**

28  
29 After the first COVID-19 case was confirmed 29<sup>th</sup> of February 2020 in Ireland, the cumulative  
30 incidence of COVID-19 confirmed cases rose above 1,000 cases by March 23<sup>th</sup> and reaching 20,612 by  
31 April 30<sup>th</sup> with 1,232 COVID-19 related deaths at that moment (**Figure 1**)[10]. For an estimated 4.90  
32 million inhabitants, intensive care bed capacity was expanded from 255 to 411 critical care beds within  
33 the Irish public health system, with additional surge capacity of up to a total of 800 beds[13]. The  
34 number of confirmed and suspected COVID-19 cases in critical care was 160 at its maximum on April  
35 4<sup>th</sup>, 2020[10].  
36  
37  
38  
39  
40  
41  
42  
43  
44

45 During January and February 2020, the two months preceding the first confirmed COVID-19  
46 case, 490 ACS-PCI were performed for the treatment of all categories of ACS. This compares with a  
47 total of 387 ACS-PCI cases in the succeeding two months. The mean daily rates per centre of PCI for  
48 all ACS, STEMI and NSTEMI-ACS are outlined in **Table 1**.  
49  
50  
51  
52  
53  
54  
55  
56  
57  
58  
59  
60

**Table 1. Mean and standard deviation of daily PCI procedures per centre for All ACS, NSTEMI-ACS and STEMI cases.**

| Period                      | Total | Daily mean per centre | ±SD  |
|-----------------------------|-------|-----------------------|------|
| <i>All ACS</i>              |       |                       |      |
| 2020-COVID <sup>a</sup>     | 387   | 1.25                  | 1.34 |
| 2020-PreCOVID <sup>b</sup>  | 490   | 1.66                  | 1.66 |
| <i>NSTEMI-ACS</i>           |       |                       |      |
| 2020-COVID <sup>a</sup>     | 212   | 0.68                  | 1.07 |
| 2020-PreCOVID <sup>b</sup>  | 288   | 0.98                  | 1.29 |
| <i>STEMI</i>                |       |                       |      |
| 2020-COVID <sup>a</sup>     | 175   | 0.56                  | 0.77 |
| 2020-PreCOVID <sup>b</sup>  | 202   | 0.68                  | 0.86 |
| 2019-Reference <sup>c</sup> | 436   | 0.73                  | 0.92 |
| 2019-Jan/Feb <sup>d</sup>   | 207   | 0.70                  | 0.91 |
| 2019-Mar/Apr <sup>e</sup>   | 229   | 0.75                  | 0.94 |

<sup>a</sup>2020-COVID is February 29<sup>th</sup> - April 30<sup>th</sup>, 2020 (62 days);

<sup>b</sup>2020-PreCOVID is January 1<sup>st</sup> - February 28<sup>th</sup>, 2020 (59 days);

<sup>c</sup>2019-Reference is January 1<sup>st</sup> - April 30<sup>th</sup>, 2019 (120 days);

<sup>d</sup>2019-Jan/Feb is January 1<sup>st</sup> - Feb 28<sup>th</sup>, 2019 (59 days);

<sup>e</sup>2019-Mar/Apr is March 1<sup>st</sup> - April 30<sup>th</sup>, 2019 (61 days).

During the '2020-COVID' period, there was a 24% reduction in PCI for the treatment of all ACS as compared to the '2020-PreCOVID' period (Incidence Rate Ratio[IRR] 0.76, 95% confidence interval (CI) 0.65-0.88;  $p < 0.001$ ) (Table 2).

**Table 2. Comparison of PCI for the treatment of All ACS, NSTEMI-ACS and STEMI for the study period (2020-COVID) versus control period.**

| Period                       | Incidence rate ratio | 95% Confidence Interval | P-Value |
|------------------------------|----------------------|-------------------------|---------|
| <i>All ACS</i>               |                      |                         |         |
| 2020-COVID to 2020-PreCOVID  | 0.76                 | 0.65 – 0.88             | <0.001  |
| <i>NSTEMI-ACS</i>            |                      |                         |         |
| 2020-COVID to 2020-PreCOVID  | 0.71                 | 0.57 – 0.88             | 0.002   |
| <i>STEMI</i>                 |                      |                         |         |
| 2020-COVID to 2020-PreCOVID  | 0.82                 | 0.67 – 1.01             | 0.061   |
| 2020-COVID to 2019-Reference | 0.78                 | 0.65 – 0.93             | 0.005   |
| 2019-Jan/Feb to 2019-Apr/May | 1.05                 | 0.87 – 1.27             | 0.583   |
| 2020-COVID to 2019-Apr/May   | 0.76                 | 0.62 – 0.92             | 0.006   |

There was a corresponding 29% reduction in PCI for the treatment of NSTEMI-ACS (IRR 0.71, 95% CI 0.57-0.88;  $p = 0.002$ ) and an 18% reduction in PCI for STEMI (IRR 0.82, 95% CI 0.67-1.01;  $p = 0.061$ ), as

1  
2  
3 compared to the '2020-PreCOVID' period (**Table 2**). During the '2020-COVID' period there was also a  
4  
5 22% reduction in PCI performed for the treatment of STEMI as compared to the '2019-Reference'  
6  
7 period (IRR 0.78, 95% CI 0.65-0.93;  $p=0.005$ ) (**Table 2**).  
8  
9

10 To assess confounding of the results by seasonal variability between the '2020-PreCOVID' and  
11  
12 '2020-COVID' period (i.e. to verify whether admissions change naturally over time), we compared the  
13  
14 overall STEMI rate in January/February 2019 with that of March/April 2019. There was no significant  
15  
16 variability between both periods (IRR 1.05, 95% CI 0.87-1.27;  $p=0.583$ ) (**Table 2**). Results were also  
17  
18 reproducible year on year when we considered the STEMI PCI incidence in the period of March-April  
19  
20 2019 as compared to the corresponding '2020-COVID' period, with a significant 24% lower PCI rate  
21  
22 for STEMI in the '2020-COVID' period (IRR 0.76; 95% CI 0.62-0.92;  $p=0.006$ ) (**Table 2**).  
23  
24  
25  
26  
27  
28  
29

## 30 **DISCUSSION**

31  
32 This study demonstrates a substantial reduction in PCI procedures performed for the  
33  
34 treatment of all ACS, NSTEMI-ACS and STEMI during the initial stages of the COVID-19 pandemic in  
35  
36 Ireland. During the two months since the first confirmed COVID-19 case, PCI rates for the treatment  
37  
38 of all ACS, NSTEMI-ACS and STEMI dropped by 24%, 29% and 18%, respectively, with respect to the prior  
39  
40 two months (**Figure 1**) (**Figure 2**). As compared to the 2019 reference period, there was a 22%  
41  
42 reduction of PCI for STEMI during the '2020-COVID' period (**Figure 3**).  
43  
44  
45

46 These data correspond with data from other countries detailing similar reductions in STEMI  
47  
48 cases and ACS hospital admissions[3-8]. Here we highlight the impact of COVID-19 on the actual  
49  
50 number of PCI procedures performed for the treatment of all ACS since the COVID-19 outbreak. This  
51  
52 data is of particular relevance as it seems the pandemic affects both the number of patients presenting  
53  
54 to hospital with ACS as well as the number of patients that undergo PCI as a treatment for ACS. It has  
55  
56 been shown in other jurisdictions that the hospital admission rate for ACS itself has declined and the  
57  
58 reduction in admissions is also mirrored in a downward trend in PCI rates[16]. Since coronary  
59  
60

1  
2  
3 revascularisation has a proven survival benefit in the treatment of both STEMI and NSTEMI-ACS, this  
4  
5 raises concern for incremental cardiac morbidity and mortality during the initial phases of the COVID-  
6  
7 19 pandemic.  
8  
9

10 It is difficult to fully account for this sudden and significant drop in PCI performed for the  
11  
12 treatment of ACS among these primary PCI centres. In Ireland, where the healthcare system was not  
13  
14 overwhelmed by COVID-19 cases, the emergency departments and primary PCI facilities remained  
15  
16 operational without any capacity limitation. Potential factors for an observed reduction in ACS  
17  
18 treatments include changes in lifestyle or environmental factors, such as workplace stressors or  
19  
20 exposure to air pollution. The link between environmental pollution and cardiovascular outcomes is  
21  
22 long established with both short- and long-term exposures to pollutants such as PM<sub>2.5</sub> (fine  
23  
24 particulate matter  $\leq 2.5 \mu\text{m}$  in aerodynamic diameter), Nitrogen Dioxide and Ozone linked with  
25  
26 ACS[17,18]. Indeed, there have been changes in air quality recorded during lockdowns for COVID-19,  
27  
28 both in Ireland and abroad with Nitrogen Dioxide levels in Ireland well-below expected levels  
29  
30 compared to previous years[19-21]. In contrast to findings in major industrial cities worldwide there  
31  
32 was not a significant drop in PM<sub>2.5</sub> in Ireland[22]. However, it remains plausible that a rapid  
33  
34 reduction in particulate and other environmental pollutants could contribute to a reduction in ACS  
35  
36 incidence and mortality.  
37  
38  
39  
40

41 We must also consider the potential effect of physician selection of patients for intervention  
42  
43 on PCI rates. A more conservative approach to patient selection could contribute to a fall in invasive  
44  
45 intervention with more patients being managed non-invasively. Misconceptions in the required acuity  
46  
47 of management of STEMI vs NSTEMI-ACS could also lead to differences in referral patterns from non-  
48  
49 specialist centres. Assuming a tendency towards a more conservative approach to management of  
50  
51 NSTEMI-ACS could explain why the drop in procedures was more exaggerated in this group. Indeed, a  
52  
53 suggestion of a move to a lower risk profile of patient has been seen during the pandemic in other  
54  
55 jurisdictions that have shown drops in PCI rates for STEMI and NSTEMI-ACS[23].  
56  
57  
58  
59  
60

1  
2  
3 One of the major overriding concerns however is that the true incidence of ACS in the  
4 population has remained largely unchanged during the COVID-19 pandemic and that the proportion  
5 of patients presenting to the hospital appropriately has fallen. The worry here is that a large  
6 proportion of ACS patients may not be presenting, or delaying their presentation, to health care  
7 facilities despite measures to preserve the function and capacity of emergency departments and acute  
8 cardiac facilities in Ireland. The Irish Cardiac Society conducted a survey amongst cardiologists at the  
9 height of the pandemic and reported that the reduction in ACS presentations to hospitals were  
10 attributed to: (1) people's fear of being exposed to COVID-19 within a healthcare facility (97%); (2)  
11 people not leaving their homes due to the government restrictions (41%); and, (3) people worried  
12 about putting a burden on the health services (41%)[24]. Fear for the healthcare environment as well  
13 as unawareness of the risk-mitigation efforts set up by the hospitals, were the overarching themes  
14 reported by patients in a series of semi-structured interviews performed during the pandemic in an  
15 American population[25]. Indeed, in relation to these latter assertions, cumulative incidence of PCI  
16 rates for ACS suggests further diverging of the curves the moment social distancing and lockdown  
17 measures were put in place, two weeks after the first confirmed COVID-19 case (**Figure 1**).

18  
19  
20  
21  
22  
23  
24  
25  
26  
27  
28  
29  
30  
31  
32  
33  
34  
35  
36  
37 Anecdotal evidence suggests that the reduction/delay in presenting to hospital with ACS  
38 during the COVID-19 era has resulted in an increase in the proportion of mechanical  
39 complications[26]. Indeed, recent studies have documented both prolonged delays from symptom  
40 onset to first medical contact, increased door-to-balloon time and total ischaemia time for the  
41 reduced number of patients who do present to hospital[27,28].

42  
43  
44  
45  
46  
47  
48  
49  
50  
51  
52  
53  
54  
55  
56  
57  
58  
59  
60  
Given the reduction in acute coronary revascularisation observed in the current study and  
assuming the true incidence of ACS has not changed significantly, it is possible that we will yet see a  
future wave of new post-myocardial infarction induced heart failure presentations and arrhythmias  
leading to further morbidity and mortality. It will take a significant period of time before the true  
measure of effect of this pandemic in a cardiovascular sense is known and we will need to monitor  
excess mortality figures to assess for this indirect impact caused by this pandemic.

1  
2  
3 Our study has limitations. First, we were only able to include five of six Primary PCI centres in  
4 Ireland. The participating centres however, account for more than three quarters of all STEMI  
5 presentations in Ireland. Herein, we present the daily numbers of PCI procedures for the treatment of  
6 ACS, rather than hospital admissions for PCI. Using ACS-related PCI activity could underestimate the  
7 true incidence of ACS presenting to hospitals due to alterations in clinical practice patterns, such as  
8 an increased use of non-invasive strategies. However, our objective was to evaluate the patterns of  
9 invasive treatment of ACS during the COVID-19 pandemic. Further information on the number of ACS  
10 presentations to the participating hospitals as well as referrals for intervention from district hospitals  
11 that were treated non-invasively were not available. Additional complete clinical and mortality data  
12 were not available for all centres participating and therefore were not analysed.  
13  
14  
15  
16  
17  
18  
19  
20  
21  
22  
23  
24  
25  
26  
27

28 In conclusion, we report a one quarter reduction in PCI for ACS during the COVID-19 pandemic  
29 in an affected, but not overwhelmed, European health-care system. Reasons for this reduction are  
30 numerous and varied. Clear public health messaging and measures are required to encourage patients  
31 to seek medical attention for non-COVID-19 related illness.  
32  
33  
34  
35  
36  
37  
38  
39  
40  
41  
42  
43  
44  
45  
46  
47  
48  
49  
50  
51  
52  
53  
54  
55  
56  
57  
58  
59  
60



### **FUNDING STATEMENT**

‘This research received no specific grant from any funding agency in the public, commercial or not-for-profit sectors’.

### **AUTHOR CONTRIBUTIONS**

- Niall P Connolly, Darren Mylotte, Liesbeth Rosseel; formed the concept, designed, wrote and revised the paper.
- Andrew J Simpkin; statistical analysis, graphics, critical revision of the paper for important intellectual content, final approval of the version to be published.
- James Crowley, Stephen O'Connor, Khalid AlHarbi, Thomas J Kiernan, Sacchin Arockiam, Patrick Owens, Amal John, Gavin J Blake, Sean Fitzgerald, Diarmaid Cadogan; data acquisition, critical revision of the paper for important intellectual content, final approval of the version to be published.
- All authors agree to be accountable for all aspects of the work in ensuring that questions related to the accuracy or integrity of any part of the work are appropriately investigated and resolved.

## REFERENCES

1. Smeeth L, Thomas SL, Hall AJ et al. Risk of myocardial infarction and stroke after acute infection or vaccination. *N Engl J Med* 2004 Dec 16;351(25):2611-8.  
doi:10.1056/NEJMoa041747
2. Kwong, JC, Schwartz KL, Campitelli MA et al. Acute Myocardial Infarction after Laboratory-Confirmed Influenza Infection. *N Engl J Med* 2018 Jan 25;378(4):345-353. doi:10.1056/nejmoa1702090
3. Garcia S, Albaghdadi MS, Meraj PM et al. Reduction in ST-Segment Elevation Cardiac Catheterization Laboratory Activations in the United States during COVID-19 Pandemic. *J Am Coll Cardiol*. 2020 Apr 9. pii: S0735-1097(20)34913-5. doi: 10.1016/j.jacc.2020.04.011.[Epub ahead of print]
4. De Filippo O, D'Ascenzo F, Angelini F et al. Reduced Rate of Hospital Admissions for ACS during COVID-19 Outbreak in Northern Italy. *N Engl J Med*. 2020 Apr 28. doi: 10.1056/NEJMc2009166.[Epub ahead of print]
5. Rodríguez-Leor O, Cid-Álvarez B, Ojeda S et al. Impacto de la pandemia de COVID-19 sobre la actividad asistencial en cardiología intervencionista en España. *Rec Interv Cardiol*. 2020;2:82-89. doi:10.24875/RECIC.M20000120
6. Rangé G, Hakim R, Motreff P. Where have the STEMIs gone during COVID-19 lockdown? *Eur Heart J Qual Care Clin Outcomes*. 2020 Apr 29. pii: qcaa034. doi: 10.1093/ehjqcco/qcaa034.[Epub ahead of print]
7. De Rosa SC, Spaccarotella C, Basso C et al. Reduction of Hospitalizations for Myocardial Infarction in Italy in the COVID-19 Era. *Eur Heart J*. 2020 May 15;ehaa409. doi: 10.1093/eurheartj/ehaa409. Online ahead of print.
8. Metzler B, Siostrzonek P, Binder RK et al. Decline of Acute Coronary Syndrome Admissions in Austria Since the Outbreak of COVID-19: The Pandemic Response Causes Cardiac Collateral Damage. *Eur Heart J*. 2020 May 14;41(19):1852-1853. doi: 10.1093/eurheartj/ehaa314.

- 1  
2  
3 9. Neumann FJ, Sousa-Uva M, Ahlsson A et al; ESC Scientific Document Group. 2018 ESC/EACTS  
4 Guidelines on myocardial revascularization. *Eur Heart J*. 2019 Jan 7;40(2):87-165. doi:  
5  
6 10.1093/eurheartj/ehy394. PMID: 30165437.  
7  
8
- 9  
10 10. Department of Health, Ireland. Latest updates on COVID-19 (Coronavirus).  
11  
12 <https://www.gov.ie/en/news/7e0924-latest-updates-on-covid-19-coronavirus/> (2021 Feb  
13 1704 June 2020)  
14  
15
- 16 11. Health Service Executive, Ireland. National Clinical Programmes – Acute Coronary Syndrome.  
17  
18 <https://www.hse.ie/eng/about/who/cspd/ncps/acs/> (2021 Feb 1724 May 2020)  
19  
20
- 21 12. Health Service Executive, Ireland. Report of the National Clinical Programme for Acute  
22  
23 Coronary Syndrome (ACS) on standardising treatment of patients with STEMI in 2016.  
24  
25 [https://www.hse.ie/eng/about/who/cspd/ncps/acs/resources/heart-attack-care-in-  
26 2016.pdf/](https://www.hse.ie/eng/about/who/cspd/ncps/acs/resources/heart-attack-care-in-2016.pdf/) (4 June 20202021 Feb 17)  
27  
28
- 29 13. Central Statistics Office, Ireland. Population and Labour Force Projections 2017 – 2051.  
30  
31 [https://www.cso.ie/en/releasesandpublications/ep/p-  
32 plfp/populationandlabourforceprojections2017-2051/populationprojectionsresults/](https://www.cso.ie/en/releasesandpublications/ep/p-plfp/populationandlabourforceprojections2017-2051/populationprojectionsresults/) (04 Jun  
33 2020)  
34  
35
- 36 14. Ibanez B, James S, Agewall S et al; ESC Scientific Document Group. 2017 ESC Guidelines for  
37  
38 the management of acute myocardial infarction in patients presenting with ST-segment  
39  
40 elevation: The Task Force for the management of acute myocardial infarction in patients  
41  
42 presenting with ST-segment elevation of the European Society of Cardiology (ESC). *Eur Heart  
43 J*. 2018 Jan 7;39(2):119-177. doi: 10.1093/eurheartj/ehx393. PMID: 28886621.  
44  
45
- 46 15. Roffi M, Patrono C, Collet JP et al; ESC Scientific Document Group. 2015 ESC Guidelines for  
47  
48 the management of acute coronary syndromes in patients presenting without persistent ST-  
49  
50 segment elevation: Task Force for the Management of Acute Coronary Syndromes in  
51  
52 Patients Presenting without Persistent ST-Segment Elevation of the European Society of  
53  
54 Cardiology (ESC). *Eur Heart J*. 2016 Jan 14;37(3):267-315. doi: 10.1093/eurheartj/ehv320.  
55  
56  
57  
58  
59  
60

- 1  
2  
3 Epub 2015 Aug 29. PMID: 26320110. Central Statistics Office, Ireland. Population and Labour  
4 Force Projections 2017 – 2051. [https://www.cso.ie/en/releasesandpublications/ep/p-](https://www.cso.ie/en/releasesandpublications/ep/p-plfp/populationandlabourforceprojections2017-2051/populationprojectionsresults/)  
5 [plfp/populationandlabourforceprojections2017-2051/populationprojectionsresults/](https://www.cso.ie/en/releasesandpublications/ep/p-plfp/populationandlabourforceprojections2017-2051/populationprojectionsresults/) (04 Jun  
6 2020)  
7  
8  
9  
10  
11  
12 16. Moroni F, Gramegna M, Ajello S et al. Collateral damage: medical care avoidance behavior  
13 among patients with acute coronary syndrome during the COVID-19 pandemic, *JACC Case*  
14 *Reports* (2020), doi: <https://doi.org/10.1016/j.jaccas.2020.04.010>.  
15  
16  
17  
18  
19 17. Pope CA, Muhlestein JB, Anderson JL et al. Short-Term Exposure to Fine Particulate Matter  
20 Air Pollution Is Preferentially Associated With the Risk of ST-Segment Elevation Acute  
21 Coronary Events. *J Am Heart Assoc*. 2015 Dec 8;4(12):e002506. doi:  
22 [10.1161/JAHA.115.002506](https://doi.org/10.1161/JAHA.115.002506).  
23  
24  
25  
26  
27  
28 18. Rajagopalan S, Al-Kindi SG, Brook RD. Air Pollution and Cardiovascular Disease: JACC State-  
29 of-the-Art Review. *J Am Coll Cardiol*. 2018 Oct 23;72(17):2054-2070. doi:  
30 [10.1016/j.jacc.2018.07.099](https://doi.org/10.1016/j.jacc.2018.07.099).  
31  
32  
33  
34  
35 19. Environmental Protection Agency, Ireland. Recent trends in nitrogen dioxide (NO<sub>2</sub>) levels in  
36 air (Ireland). 2020 Dec 17.  
37 <http://www.epa.ie/newsandevents/news/pressreleases2020/name,70312,en.html> (2021  
38 Feb 19)  
39  
40  
41  
42  
43 20. Jephcote C, Hansell AL, Adams K et al. Changes in air quality during COVID-19 'lockdown' in  
44 the United Kingdom. *Environ Pollut*. 2021 Mar 1;272:116011.  
45 doi:10.1016/j.envpol.2020.116011. Epub 2020 Nov 20.  
46  
47  
48  
49  
50 21. He, G., Pan, Y. & Tanaka, T. The short-term impacts of COVID-19 lockdown on urban air  
51 pollution in China. *Nat Sustain* 3, 1005–1011 (2020). [https://doi.org/10.1038/s41893-020-](https://doi.org/10.1038/s41893-020-0581-y)  
52 [0581-y](https://doi.org/10.1038/s41893-020-0581-y)  
53  
54  
55  
56  
57  
58  
59  
60

- 1  
2  
3 22. Environmental Protection Agency, Ireland. Recent trends in air pollution levels in Ireland.  
4  
5 2020 Apr 9.  
6  
7 <http://www.epa.ie/newsandevents/news/pressreleases2020/name,68631,en.html>  
8  
9
- 10 23. Kwok CS, Gale CP, Curzen N et al. Impact of the COVID-19 Pandemic on Percutaneous  
11  
12 Coronary Intervention in England: Insights From the British Cardiovascular Intervention  
13  
14 Society PCI Database Cohort. *Circ Cardiovasc Interv*. 2020 Nov;13(11):e009654. doi:  
15  
16 10.1161/CIRCINTERVENTIONS.120.009654. Epub 2020 Nov 3.  
17  
18
- 19 24. Irish Cardiac Society. Acute Coronary Syndromes activity during COVID-19 Irish Cardiac  
20  
21 Society Survey, April 2020. Dublin: Irish Cardiac Society; 2020  
22
- 23 25. Wong LE, Hawkins JE, Langness S et al. Where are all the patients? Addressing Covid-19 fear  
24  
25 to encourage sick patients to seek emergency care. *NEJM Catalyst Innovations in Care*  
26  
27 *Delivery*. 2020;1:3 doi: 10.1056/CAT.20.0193  
28  
29
- 30 26. Mafham MM, Spata E, Goldacre R et al. COVID-19 pandemic and admission rates for and  
31  
32 management of acute coronary syndromes in England. *Lancet*. 2020 Aug 8;396(10248):381-  
33  
34 389. doi: 10.1016/S0140-6736(20)31356-8. Epub 2020 Jul 14.  
35  
36
- 37 27. Perrin N, Iglesias JF, Rey F, Benzakour L, Cimci M, Noble S, Degrauwe S, Tessitore E, Mach F,  
38  
39 Roffi M. Impact of the COVID-19 pandemic on acute coronary syndromes. *Swiss Med Wkly*.  
40  
41 2020 Dec 31;150:w20448. doi: 10.4414/smw.2020.20448.  
42  
43
- 44 28. De Luc, G, Verdoia M, Cercek M. et al. "Impact of COVID-19 Pandemic on Mechanical  
45  
46 Reperfusion for Patients With STEMI." *Journal of the American College of Cardiology* vol.  
47  
48 76,20 (2020): 2321-2330. doi:10.1016/j.jacc.2020.09.546  
49  
50  
51  
52  
53  
54  
55  
56  
57  
58  
59  
60

### **FIGURE LEGENDS**

**Figure 1. Panel A** the cumulative incidence of PCI procedures for the treatment of All ACS is demonstrated during two months preceding (green) and succeeding (red) the first confirmed COVID-19 case in Ireland over time; **Panel B**, the daily new confirmed COVID-19 cases in Ireland with the orange line representing the locally smoothed trend; **Panel C**, The locally smoothed trend of COVID-19 daily new hospital and ICU admissions and confirmed/suspected deaths over time in Ireland; the orange dotted line in panel A, B and C represents the national closure of schools (13<sup>th</sup> March), the red dotted line represents the date of full lockdown implementation (28<sup>th</sup> March). (PCI, percutaneous coronary intervention; ACS, acute coronary syndrome; ICU, intensive care unit)

**Figure 2. Cumulative incidence of PCI procedures for the treatment of NSTEMI-ACS and STEMI during the 2020-COVID period and the 2020-PreCOVID period. Panel A** shows the overall cumulative incidence of PCI performed for the treatment of NSTEMI-ACS during 2020-PreCOVID (green) and 2020-COVID (red); In **Panel B** the overall cumulative incidence of PCI performed for the treatment of STEMI during the 2020-PreCOVID (green) and 2020-COVID periods (red) is shown; the orange dotted line in panel A and B represents the national closure of schools, the red dotted line represents the date of full lockdown implementation. (PCI, percutaneous coronary intervention; NSTEMI-ACS, non-ST elevation acute coronary syndrome; STEMI, ST-elevation myocardial infarction).

**Figure 3. Cumulative incidence of PCI procedures for the treatment of STEMI comparing 2019 to 2020.** The cumulative incidence of PCI procedures for the treatment of STEMI comparing January to April 2019 (green) to the same period in 2020 (red); the orange dotted line represents the national closure of schools, the red dotted line represents the date of full lockdown implementation. (PCI, percutaneous coronary intervention; STEMI, ST-elevation myocardial infarction)

1  
2  
3  
4  
5  
6  
7  
8  
9  
10  
11  
12  
13  
14  
15  
16  
17  
18  
19  
20  
21  
22  
23  
24  
25  
26  
27  
28  
29  
30  
31  
32  
33  
34  
35  
36  
37  
38  
39  
40  
41  
42  
43  
44  
45  
46  
47  
48  
49  
50  
51  
52  
53  
54  
55  
56  
57  
58  
59  
60

**DATA AVAILABILITY STATEMENT**

The data underlying this article will be shared on reasonable request to the corresponding author.

For peer review only

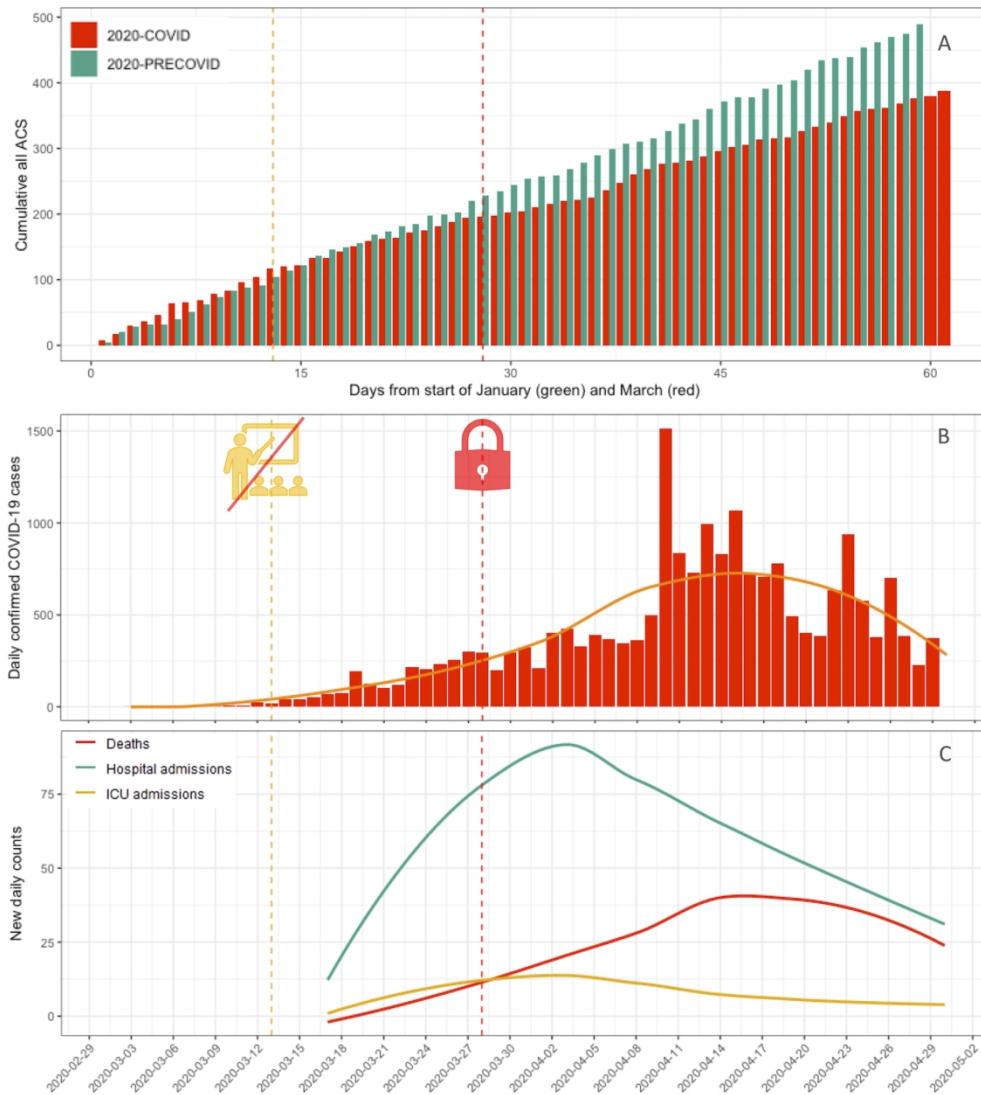

Figure 1. Panel A the cumulative incidence of PCI procedures for the treatment of All ACS is demonstrated during two months preceding (green) and succeeding (red) the first confirmed COVID-19 case in Ireland over time; Panel B, the daily new confirmed COVID-19 cases in Ireland with the orange line representing the locally smoothed trend; Panel C, The locally smoothed trend of COVID-19 daily new hospital and ICU admissions and confirmed/suspected deaths over time in Ireland; the orange dotted line in panel A, B and C represents the national closure of schools (13th March), the red dotted line represents the date of full lockdown implementation (28th March). (PCI, percutaneous coronary intervention; ACS, acute coronary syndrome; ICU, intensive care unit)

150x166mm (300 x 300 DPI)



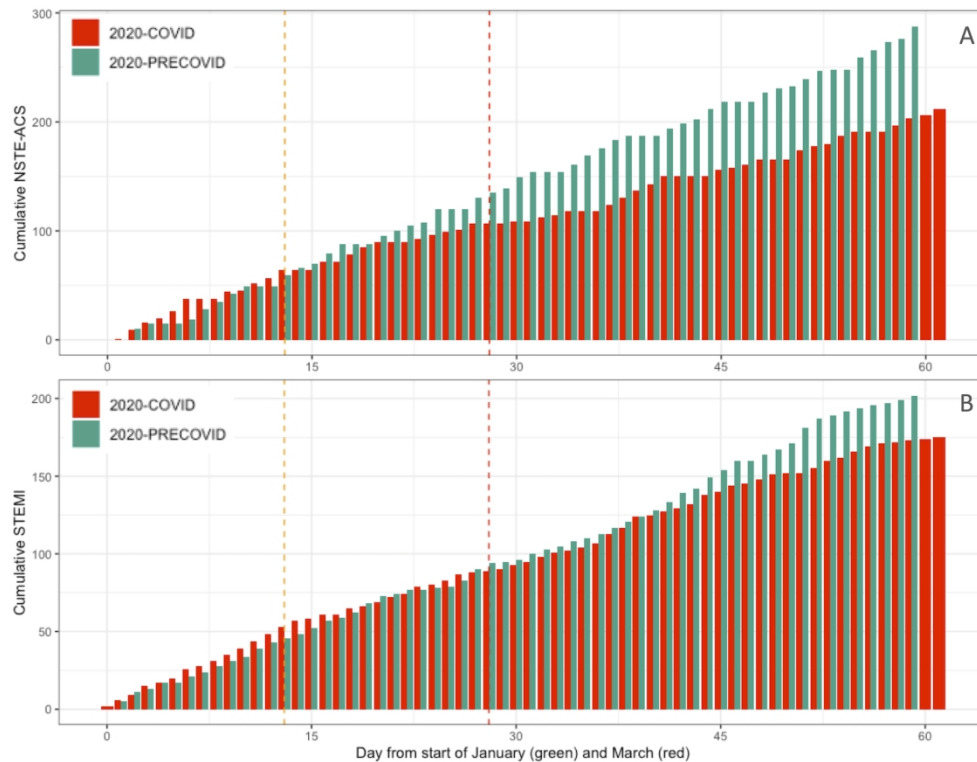

Figure 2. Cumulative incidence of PCI procedures for the treatment of NSTEMI-ACS and STEMI during the 2020-COVID period and the 2020-PreCOVID period. Panel A shows the overall cumulative incidence of PCI performed for the treatment of NSTEMI-ACS during 2020-PreCOVID (green) and 2020-COVID (red); In Panel B the overall cumulative incidence of PCI performed for the treatment of STEMI during the 2020-PreCOVID (green) and 2020-COVID periods (red) is shown; the orange dotted line in panel A and B represents the national closure of schools, the red dotted line represents the date of full lockdown implementation. (PCI, percutaneous coronary intervention; NSTEMI-ACS, non-ST elevation acute coronary syndrome; STEMI, ST-elevation myocardial infarction).

150x117mm (300 x 300 DPI)

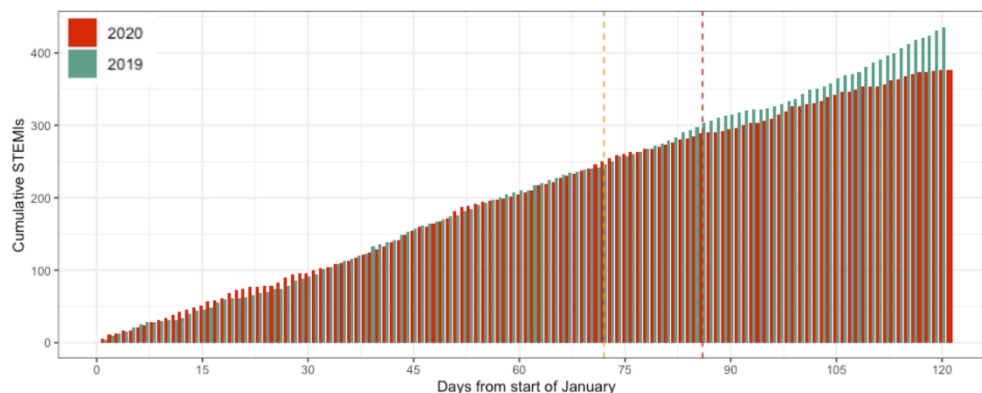

Figure 3. Cumulative incidence of PCI procedures for the treatment of STEMI comparing 2019 to 2020. The cumulative incidence of PCI procedures for the treatment of STEMI comparing January to April 2019 (green) to the same period in 2020 (red); the orange dotted line represents the national closure of schools, the red dotted line represents the date of full lockdown implementation. (PCI, percutaneous coronary intervention; STEMI, ST-elevation myocardial infarction)

150x61mm (300 x 300 DPI)

STROBE Statement—Checklist of items that should be included in reports of *cohort studies*

|                              | Item No | Recommendation                                                                                                                                                                       | Page No | Relevant text from Manuscript               |
|------------------------------|---------|--------------------------------------------------------------------------------------------------------------------------------------------------------------------------------------|---------|---------------------------------------------|
| <b>Title and abstract</b>    | 1       | (a) Indicate the study's design with a commonly used term in the title or the abstract                                                                                               | 1       | Title                                       |
|                              |         | (b) Provide in the abstract an informative and balanced summary of what was done and what was found                                                                                  | 2       | Abstract                                    |
| <b>Introduction</b>          |         |                                                                                                                                                                                      |         |                                             |
| Background/rationale         | 2       | Explain the scientific background and rationale for the investigation being reported                                                                                                 | 3       | Introduction                                |
| Objectives                   | 3       | State specific objectives, including any prespecified hypotheses                                                                                                                     | 3       | Introduction – Final summarizing sentence   |
| <b>Methods</b>               |         |                                                                                                                                                                                      |         |                                             |
| Study design                 | 4       | Present key elements of study design early in the paper                                                                                                                              | 5-7     | Methods                                     |
| Setting                      | 5       | Describe the setting, locations, and relevant dates, including periods of recruitment, exposure, follow-up, and data collection                                                      | 5,6     | Methods – Study Population, Definitions     |
| Participants                 | 6       | (a) Give the eligibility criteria, and the sources and methods of selection of participants. Describe methods of follow-up                                                           | 5,6     | Methods – Study Population, Definitions     |
|                              |         | (b) For matched studies, give matching criteria and number of exposed and unexposed                                                                                                  |         | Not applicable                              |
| Variables                    | 7       | Clearly define all outcomes, exposures, predictors, potential confounders, and effect modifiers. Give diagnostic criteria, if applicable                                             | 6,7     | Methods – Definitions, Statistical Analysis |
| Data sources/<br>measurement | 8*      | For each variable of interest, give sources of data and details of methods of assessment (measurement). Describe comparability of assessment methods if there is more than one group | 5,6     | Methods – Definitions                       |
| Bias                         | 9       | Describe any efforts to address potential sources of bias                                                                                                                            | 6,7     | Methods – Statistical Analysis              |
| Study size                   | 10      | Explain how the study size was arrived at                                                                                                                                            |         | Not applicable                              |
| Quantitative variables       | 11      | Explain how quantitative variables were handled in the analyses. If applicable, describe which groupings were chosen and why                                                         |         | Not applicable                              |
| Statistical methods          | 12      | (a) Describe all statistical methods, including those used to control for confounding                                                                                                | 6,7     | Methods – Statistical Analysis              |
|                              |         | (b) Describe any methods used to examine subgroups and interactions                                                                                                                  | 6,7     | Methods – Statistical Analysis              |
|                              |         | (c) Explain how missing data were addressed                                                                                                                                          | 13      | See limitations                             |
|                              |         | (d) If applicable, explain how loss to follow-up was addressed                                                                                                                       |         | Not Applicable                              |

(e) Describe any sensitivity analyses

| <b>Results</b>           |     |                                                                                                                                                                                                              |       |                                                                           |
|--------------------------|-----|--------------------------------------------------------------------------------------------------------------------------------------------------------------------------------------------------------------|-------|---------------------------------------------------------------------------|
| Participants             | 13* | (a) Report numbers of individuals at each stage of study—eg numbers potentially eligible, examined for eligibility, confirmed eligible, included in the study, completing follow-up, and analysed            |       | Not applicable                                                            |
|                          |     | (b) Give reasons for non-participation at each stage                                                                                                                                                         |       | Not applicable                                                            |
|                          |     | (c) Consider use of a flow diagram                                                                                                                                                                           |       | Not applicable                                                            |
| Descriptive data         | 14* | (a) Give characteristics of study participants (eg demographic, clinical, social) and information on exposures and potential confounders                                                                     | 13    | See limitations, limited data set without demographic, social information |
|                          |     | (b) Indicate number of participants with missing data for each variable of interest                                                                                                                          |       | See limitations, limited data set without demographic, social information |
|                          |     | (c) Summarise follow-up time (eg, average and total amount)                                                                                                                                                  | 5,6   | Methods – Study Population, Definitions                                   |
| Outcome data             | 15* | Report numbers of outcome events or summary measures over time                                                                                                                                               | 7-10  | Results                                                                   |
| Main results             | 16  | (a) Give unadjusted estimates and, if applicable, confounder-adjusted estimates and their precision (eg, 95% confidence interval). Make clear which confounders were adjusted for and why they were included | 7-10  | Results                                                                   |
|                          |     | (b) Report category boundaries when continuous variables were categorized                                                                                                                                    |       | Not applicable                                                            |
|                          |     | (c) If relevant, consider translating estimates of relative risk into absolute risk for a meaningful time period                                                                                             |       | Not applicable                                                            |
| Other analyses           | 17  | Report other analyses done—eg analyses of subgroups and interactions, and sensitivity analyses                                                                                                               | 7-10  | Results                                                                   |
| <b>Discussion</b>        |     |                                                                                                                                                                                                              |       |                                                                           |
| Key results              | 18  | Summarise key results with reference to study objectives                                                                                                                                                     | 10-13 | Discussion                                                                |
| Limitations              | 19  | Discuss limitations of the study, taking into account sources of potential bias or imprecision. Discuss both direction and magnitude of any potential bias                                                   | 13    | See limitations                                                           |
| Interpretation           | 20  | Give a cautious overall interpretation of results considering objectives, limitations, multiplicity of analyses, results from similar studies, and other relevant evidence                                   | 10-13 | Discussion                                                                |
| Generalisability         | 21  | Discuss the generalisability (external validity) of the study results                                                                                                                                        | 10-13 | Discussion and Conclusion                                                 |
| <b>Other information</b> |     |                                                                                                                                                                                                              |       |                                                                           |
| Funding                  | 22  | Give the source of funding and the role of the funders for the present study and, if                                                                                                                         | 14    | Funding Statement                                                         |

---

applicable, for the original study on which the present article is based

---

\*Give information separately for exposed and unexposed groups.

**Note:** An Explanation and Elaboration article discusses each checklist item and gives methodological background and published examples of transparent reporting. The STROBE checklist is best used in conjunction with this article (freely available on the Web sites of PLoS Medicine at <http://www.plosmedicine.org/>, Annals of Internal Medicine at <http://www.annals.org/>, and Epidemiology at <http://www.epidem.com/>). Information on the STROBE Initiative is available at <http://www.strobe-statement.org>.

For peer review only
